# Supplementary material
Source: PubMed Central journal article supplement (PMC2783545)
Supplement: NIHMS142127-supplement-03.pdf [file NIHMS142127-supplement-03.pdf]

## Table S1.

Enzymes' efficiency at sampling CpG islands.

The table divides the CpG islands based on the type of genomic elements with which they are overlapping. The "sampled" columns show how many CpG islands in a given group contain at least one enzyme recognition motif i.e. theoretically, how many members of the group of CpG islands will a specific endonuclease be able to cleave. The columns labeled "[%]" which immediately follow the "sampled" columns, show the percentage of all CpG islands belonging to a specific sub group that have at least one enzyme recognition site, or showing the theoretical capacity or efficiency for an enzyme to cleave the sequences of the particular sub-category of CpG islands. Analogously, the "failed" columns show how many CpG islands do not contain the enzyme recognition motif, which is shown in relative terms in the column labeled [%] immediately following the "failed" column.

The ability of enzymes to cleave particular subgroups of CpG island in the "sampled" columns, i.e. the sampling efficiency for an enzyme, is shown with respect to Acil and HhaI enzymes (used in a single buffer, and thus the numbers in "sampled" columns indicate whether a CpG island contained either Acil or HhaI motif), McrBC, and, collectively, for all three enzymes.

## Table S2.

A compilation of observations about ages of lineages within families of repetitive elements.

- A) MaLR
- B) Alu
- C) SVA
- D) L1PA

## Table S3.

A summary of an enrichment analysis where a set of probes significantly differentiating tumors and non-tumor adjacent experiments was chosen using Wilcoxon non-parametric t.test and Benjamini-Hochberg FDR correction to arrive at 15,587 probes. Probe categories defined by their proximity to a specific category of repetitive element were then checked for their enrichment in significant probes. The expected number is calculated based on the total number of probes in the array 339,314, and the total number of probes in a given category. The enrichment is then confirmed using hyper geometric test. Table sorted based on p-values, from most significant to least significant.

## Table S4.

A compilation of annotation about the tissue samples analyzed in this manuscript. In addition to the self explanatory column names such as "id", "sex", "age" containing the appropriate information, "tob" indicates whether the patient admitted to heavy tobacco usage in their lifetime. "tob\_quit" indicates whether at the time of the medical interview with the patient they indicated having quit smoking. Similarly, "etoh" and "etoh\_quit" indicate whether the patient used alcohol, and became abstinent. The remainder of the table describes the pathology of the tumor samples, i.e. their diagnosis, location, hpv status, grade and stage.

**Table S1.**  
Enzymes' efficiency at sampling CpG islands.

| CpG island near:                      | Acil & Hhal   |               |             |              | McrBC[40-3000] |               |           |              | Acil & Hhal plus McrBC |               |           |              |
|---------------------------------------|---------------|---------------|-------------|--------------|----------------|---------------|-----------|--------------|------------------------|---------------|-----------|--------------|
|                                       | sampled       | [%]           | failed      | [%]          | sampled        | [%]           | failed    | [%]          | sampled                | [%]           | failed    | [%]          |
| Gene                                  | 22065         | 99.84%        | 36          | 0.16%        | 22100          | 100.00%       | 1         | 0.00%        | 22101                  | 100.00%       | 0         | 0.00%        |
| LINE                                  | 34297         | 99.44%        | 193         | 0.56%        | 34485          | 99.99%        | 5         | 0.01%        | 34487                  | 99.99%        | 3         | 0.01%        |
| SINE                                  | 178849        | 99.45%        | 993         | 0.55%        | 179818         | 99.99%        | 24        | 0.01%        | 179840                 | 100.00%       | 2         | 0.00%        |
| LTR                                   | 22588         | 99.53%        | 106         | 0.47%        | 22692          | 99.99%        | 2         | 0.01%        | 22693                  | 100.00%       | 1         | 0.00%        |
| Satellite                             | 993           | 99.50%        | 5           | 0.50%        | 998            | 100.00%       | 0         | 0.00%        | 998                    | 100.00%       | 0         | 0.00%        |
| DNA                                   | 8411          | 99.60%        | 34          | 0.40%        | 8441           | 99.95%        | 4         | 0.05%        | 8443                   | 99.98%        | 2         | 0.02%        |
| Other repetitive element              | 3988          | 99.97%        | 1           | 0.03%        | 3989           | 100.00%       | 0         | 0.00%        | 3989                   | 100.00%       | 0         | 0.00%        |
| tandem repeat                         | 674           | 88.68%        | 86          | 11.32%       | 750            | 98.68%        | 10        | 1.32%        | 756                    | 99.47%        | 4         | 0.53%        |
| Unique, unclassified genomic sequence | 65947         | 99.38%        | 409         | 0.62%        | 66338          | 99.97%        | 18        | 0.03%        | 66350                  | 99.99%        | 6         | 0.01%        |
| <b>Total CpG Islands</b>              | <b>337812</b> | <b>99.42%</b> | <b>1863</b> | <b>0.58%</b> | <b>339611</b>  | <b>99.98%</b> | <b>64</b> | <b>0.02%</b> | <b>339657</b>          | <b>99.99%</b> | <b>18</b> | <b>0.01%</b> |

Table S2A.

A compilation of observations about ages of lineages within families of repetitive elements.

| <b>Element Family</b> | <b>Element subfamily</b> | <b>Estimated age of appearance in the genome (MYA)</b> | <b>references</b>      |
|-----------------------|--------------------------|--------------------------------------------------------|------------------------|
| <b>MaLR</b>           | <b>MLT1d</b>             | 100                                                    | Figure 4 in Smit, 1993 |
| <b>MaLR</b>           | <b>MLT1c</b>             | 85                                                     | Figure 4 in Smit, 1993 |
| <b>MaLR</b>           | <b>MLT1b</b>             | 80                                                     | Figure 4 in Smit, 1993 |
| <b>MaLR</b>           | <b>MLT1a</b>             | 77                                                     | Figure 4 in Smit, 1993 |
| <b>MaLR</b>           | <b>MSTb</b>              | 75                                                     | Figure 4 in Smit, 1993 |
| <b>MaLR</b>           | <b>MSTa</b>              | 60                                                     | Figure 4 in Smit, 1993 |
| <b>MaLR</b>           | <b>THE1c</b>             | 55                                                     | Figure 4 in Smit, 1993 |
| <b>MaLR</b>           | <b>THE1b</b>             | 50                                                     | Figure 4 in Smit, 1993 |
| <b>MaLR</b>           | <b>THE1a</b>             | 45                                                     | Figure 4 in Smit, 1993 |

**Table S2B.**

A compilation of observations about ages of lineages within families of repetitive elements.

| Element Family | Element subfamily | Estimated age of appearance in the genome (MYA) | references                                                                                                                                      |
|----------------|-------------------|-------------------------------------------------|-------------------------------------------------------------------------------------------------------------------------------------------------|
| Alu            | FLA               | 112                                             | Table 3 in Kapitonov and Jurka, 1996                                                                                                            |
| Alu            | Jo                | 44, 81                                          | Table 3 in Kapitonov and Jurka, 1996, Table S1 in Pace and Feschotte, 2007                                                                      |
| Alu            | Jb                | 42, 81                                          | Table 3 in Kapitonov and Jurka, 1996, Table S1 in Pace and Feschotte, 2007                                                                      |
| Alu            | S                 | 48                                              | Table 3 in Kapitonov and Jurka, 1996                                                                                                            |
| Alu            | Sx                | 28, 37, 44, 55                                  | Table 3 in Kapitonov and Jurka, 1996, Figure 2 in Batzer and Deininger, 2002, Table S1 in Pace and Feschotte, 2007, Table 2 in Xing et al. 2004 |
| Alu            | Sg                | 23, 31, 34, 40                                  | Table 3 in Kapitonov and Jurka, 1996, Figure 2 in Batzer and Deininger, 2002, Table S1 in Pace and Feschotte, 2007, Table 2 in Xing et al. 2004 |
| Alu            | Sq                | 25, 39, 44                                      | Table 3 in Kapitonov and Jurka, 1996, Table S1 in Pace and Feschotte, 2007, Table 2 in Xing et al. 2004                                         |
| Alu            | Sp                | 28, 37                                          | Table 3 in Kapitonov and Jurka, 1996, Table 2 in Xing et al. 2004                                                                               |
| Alu            | Sc                | 22, 30, 35                                      | Table 3 in Kapitonov and Jurka, 1996, Table S1 in Pace and Feschotte, 2007, Table 2 in Xing et al. 2004                                         |
| Alu            | Sb                | 19                                              | Table 3 in Kapitonov and Jurka, 1996                                                                                                            |
| Alu            | Y                 | 16, 35                                          | Figure 2 in Batzer and Deininger, 2002, Table S1 in Pace and Feschotte, 2007                                                                    |
| Alu            | Yd                | 15                                              | Table 2 in Xing et al. 2004                                                                                                                     |
| Alu            | Ye5               | 12                                              | Table 2 in Xing et al. 2004                                                                                                                     |
| Alu            | Yb8               | 11                                              | Figure 2 in Batzer and Deininger, 2002                                                                                                          |
| Alu            | Ya5               | 2, 11                                           | Figure 2 in Batzer and Deininger, 2002, Table 2 in Xing et al. 2004                                                                             |
| Alu            | Yc1               | 2, 5                                            | Figure 2 in Batzer and Deininger, 2002, Table 2 in Xing et al. 2004                                                                             |
| Alu            | Ya5a2             | 5                                               | Figure 2 in Batzer and Deininger, 2002                                                                                                          |
| Alu            | Yg6               | 3                                               | Table 2 in Xing et al. 2004                                                                                                                     |
| Alu            | Yb9               | 2, 5                                            | Figure 2 in Batzer and Deininger, 2002, Table 2 in Xing et al. 2004                                                                             |
| Alu            | Ya8               | 1                                               | Table 2 in Xing et al. 2004                                                                                                                     |

Table S2C.

A compilation of observations about ages of lineages within families of repetitive elements.

| <b>Element Family</b> | <b>Element subfamily</b> | <b>Estimated age of appearance in the genome (MYA)</b> | <b>references</b>           |
|-----------------------|--------------------------|--------------------------------------------------------|-----------------------------|
| <b>SVA</b>            | <b>A</b>                 | 10 - 17                                                | Table 2 in Wang et al. 2005 |
| <b>SVA</b>            | <b>B</b>                 | 11 - 12                                                | Table 2 in Wang et al. 2005 |
| <b>SVA</b>            | <b>C</b>                 | 10 - 11                                                | Table 2 in Wang et al. 2005 |
| <b>SVA</b>            | <b>D</b>                 | 9.4 - 9.5                                              | Table 2 in Wang et al. 2005 |
| <b>SVA</b>            | <b>E</b>                 | 2.4 - 4.5                                              | Table 2 in Wang et al. 2005 |
| <b>SVA</b>            | <b>F</b>                 | 2.7 - 3.6                                              | Table 2 in Wang et al. 2005 |

Table S2D.

A compilation of observations about ages of lineages within families of repetitive elements.

| <b>Element Family</b> | <b>Element subfamily</b> | <b>Estimated age of appearance in the genome (MYA)</b> | <b>references</b>           |
|-----------------------|--------------------------|--------------------------------------------------------|-----------------------------|
| L1PA                  | L1PA1                    | 3.1                                                    | Table 1 in Khan et al. 2006 |
| L1PA                  | L1PA2                    | 7.6                                                    | Table 1 in Khan et al. 2006 |
| L1PA                  | L1PA3                    | 12.5                                                   | Table 1 in Khan et al. 2006 |
| L1PA                  | L1PA4                    | 18.0                                                   | Table 1 in Khan et al. 2006 |
| L1PA                  | L1PA5                    | 20.4                                                   | Table 1 in Khan et al. 2006 |
| L1PA                  | L1PA6                    | 26.8                                                   | Table 1 in Khan et al. 2006 |
| L1PA                  | L1PA7                    | 31.4                                                   | Table 1 in Khan et al. 2006 |
| L1PA                  | L1PA8                    | 40.9                                                   | Table 1 in Khan et al. 2006 |
| L1PA                  | L1PA8A                   | 41.7                                                   | Table 1 in Khan et al. 2006 |
| L1PA                  | L1PA10                   | 46.4                                                   | Table 1 in Khan et al. 2006 |
| L1PA                  | L1PA11                   | 53.3                                                   | Table 1 in Khan et al. 2006 |
| L1PA                  | L1PA13B                  | 59.8                                                   | Table 1 in Khan et al. 2006 |
| L1PA                  | L1PA12                   | 59.7                                                   | Table 1 in Khan et al. 2006 |
| L1PA                  | L1PA13A                  | 59.9                                                   | Table 1 in Khan et al. 2006 |
| L1PA                  | L1PA14                   | 60.6                                                   | Table 1 in Khan et al. 2006 |
| L1PA                  | L1PA15                   | 70.5                                                   | Table 1 in Khan et al. 2006 |
| L1PA                  | L1PA16                   | 79.7                                                   | Table 1 in Khan et al. 2006 |
| L1PA                  | L1PA17                   | 101.1                                                  | Table 1 in Khan et al. 2006 |
| L1PB                  | L1PB1                    | 46.7                                                   | Table 1 in Khan et al. 2006 |
| L1PB                  | L1PB2                    | 58.2                                                   | Table 1 in Khan et al. 2006 |
| L1PB                  | L1PB3                    | 73.5                                                   | Table 1 in Khan et al. 2006 |
| L1PB                  | L1PB4                    | 96.0                                                   | Table 1 in Khan et al. 2006 |
| L1MA                  | L1MA1                    | 61.6                                                   | Table 1 in Khan et al. 2006 |
| L1MA                  | L1MA2                    | 65.8                                                   | Table 1 in Khan et al. 2006 |
| L1MA                  | L1MA3                    | 68.1                                                   | Table 1 in Khan et al. 2006 |
| L1MA                  | L1MA4                    | 102.3                                                  | Table 1 in Khan et al. 2006 |
| L1MA                  | L1MA5                    | 98.6                                                   | Table 1 in Khan et al. 2006 |

**Table S3.**  
A summary of an enrichment analysis

| category | # of probes significantly differentiating non-tumor adjacents and tumors (no pairs) | expected at random | enrichment | total number of probes in category | hyperGeometric p-val | # of genomic repeats | # of probed repeats |
|----------|-------------------------------------------------------------------------------------|--------------------|------------|------------------------------------|----------------------|----------------------|---------------------|
| L1P      | 800                                                                                 | 18.9               | 42         | 8,000                              | 3.18E-151            | 1,589                | 8,681               |
| L1       | 2913                                                                                | 452.8              | 6          | 52,747                             | 8.70E-139            | 895,230              | 64,191              |
| LINE     | 3699                                                                                | 829.7              | 4          | 76,107                             | 2.08E-101            | 1,354,049            | 92,711              |
| L1PA3    | 223                                                                                 | 0.8                | 295        | 1,150                              | 9.25E-96             | 10,281               | 1,146               |
| AluY     | 3211                                                                                | 680.7              | 5          | 71,931                             | 7.80E-48             | 135,761              | 72,224              |
| SINE     | 7232                                                                                | 3,919.1            | 2          | 183,877                            | 2.42E-39             | 1,744,457            | 245,936             |
| L1PA2    | 121                                                                                 | 0.3                | 382        | 888                                | 1.06E-36             | 4,666                | 874                 |
| L1PA4    | 96                                                                                  | 0.2                | 572        | 593                                | 9.76E-36             | 11,462               | 602                 |
| L1M      | 1891                                                                                | 227.7              | 8          | 40,860                             | 7.82E-34             | 11,466               | 50,879              |
| Alu      | 6390                                                                                | 3,073.2            | 2          | 163,190                            | 2.17E-28             | 1,160,276            | 205,535             |
| LTR      | 1539                                                                                | 151.1              | 10         | 33,309                             | 6.57E-27             | 641,720              | 40,016              |
| L1HS     | 56                                                                                  | 0.1                | 961        | 353                                | 2.11E-21             | 1,696                | 357                 |
| L1PA5    | 47                                                                                  | 0.1                | 812        | 418                                | 1.73E-12             | 10,904               | 428                 |
| ERV1     | 619                                                                                 | 24.2               | 26         | 13,292                             | 7.68E-12             | 175,007              | 16,078              |
| L1MC     | 449                                                                                 | 12.6               | 36         | 9,506                              | 9.72E-10             | 16,426               | 11,128              |
| MaLR     | 663                                                                                 | 29.0               | 23         | 14,865                             | 1.60E-09             | 327,397              | 16,710              |
| ERVL     | 287                                                                                 | 4.9                | 59         | 5,763                              | 9.40E-09             | 128,284              | 6,401               |
| L1P1     | 21                                                                                  | 0.0                | 2,247      | 151                                | 2.34E-08             | 2,860                | 149                 |
| L1MA1    | 41                                                                                  | 0.1                | 691        | 491                                | 2.29E-07             | 3,940                | 525                 |
| L1PA7    | 31                                                                                  | 0.0                | 1,019      | 333                                | 4.86E-07             | 12,334               | 343                 |
| L1MCc    | 27                                                                                  | 0.0                | 1,234      | 275                                | 7.76E-07             | 6,889                | 340                 |
| L1ME3    | 170                                                                                 | 1.7                | 103        | 3,304                              | 1.16E-06             | 7,572                | 3,897               |
| MLT1A    | 100                                                                                 | 0.5                | 193        | 1,756                              | 2.60E-06             | 8,650                | 1,929               |
| U3       | 19                                                                                  | 0.0                | 1,984      | 171                                | 3.46E-06             | 228                  | 103                 |
| L1MC3    | 55                                                                                  | 0.1                | 411        | 826                                | 4.84E-06             | 12,792               | 963                 |

| category | # of probes significantly differentiating non-tumor adjacents and tumors (no pairs) | expected at random | enrichment | total number of probes in category | hyperGeometric p-val | # of genomic repeats | # of probed repeats |
|----------|-------------------------------------------------------------------------------------|--------------------|------------|------------------------------------|----------------------|----------------------|---------------------|
| L1MA9    | 47                                                                                  | 0.1                | 506        | 671                                | 5.48E-06             | 14,394               | 745                 |
| L2       | 1048                                                                                | 80.3               | 13         | 26,009                             | 1.03E-05             | 403,973              | 27,360              |
| LTR7     | 42                                                                                  | 0.1                | 568        | 597                                | 1.38E-05             | 2,349                | 610                 |
| L1PA16   | 39                                                                                  | 0.1                | 625        | 543                                | 1.62E-05             | 13,098               | 589                 |
| L1MD     | 160                                                                                 | 1.5                | 104        | 3,250                              | 2.34E-05             | 10,847               | 3,749               |
| L1ME1    | 98                                                                                  | 0.5                | 186        | 1,821                              | 3.01E-05             | 26,938               | 2,131               |
| L1ME3B   | 91                                                                                  | 0.4                | 202        | 1,677                              | 4.05E-05             | 27,528               | 1,993               |
| L1MC1    | 49                                                                                  | 0.1                | 437        | 777                                | 5.63E-05             | 11,868               | 864                 |
| THE1D    | 34                                                                                  | 0.0                | 704        | 482                                | 6.96E-05             | 12,381               | 512                 |
| L1MA2    | 25                                                                                  | 0.0                | 1,054      | 322                                | 1.06E-04             | 6,911                | 347                 |
| L1M4     | 108                                                                                 | 0.7                | 159        | 2,131                              | 1.37E-04             | 19,504               | 2,520               |
| L1PA15   | 28                                                                                  | 0.0                | 884        | 384                                | 1.43E-04             | 8,233                | 429                 |
| L1PB     | 70                                                                                  | 0.3                | 268        | 1,264                              | 1.43E-04             | 1,520                | 1,379               |
| AluSc    | 504                                                                                 | 18.0               | 28         | 12,148                             | 1.88E-04             | 48,789               | 11,969              |
| ERVK     | 53                                                                                  | 0.1                | 372        | 911                                | 2.35E-04             | 10,461               | 1,019               |
| L1P4     | 23                                                                                  | 0.0                | 1,116      | 304                                | 2.67E-04             | 5,156                | 328                 |
| L1M4c    | 29                                                                                  | 0.0                | 806        | 421                                | 3.00E-04             | 7,787                | 504                 |
| L1MB1    | 21                                                                                  | 0.0                | 1,257      | 270                                | 3.05E-04             | 5,670                | 299                 |
| LTR2     | 46                                                                                  | 0.1                | 440        | 771                                | 3.11E-04             | 847                  | 861                 |
| L1PA8    | 27                                                                                  | 0.0                | 881        | 385                                | 3.38E-04             | 7,715                | 405                 |
| MIR      | 1517                                                                                | 176.1              | 9          | 39,390                             | 3.63E-04             | 584,181              | 40,401              |
| L3       | 170                                                                                 | 1.9                | 92         | 3,702                              | 4.11E-04             | 47,228               | 3,473               |
| L1MA6    | 17                                                                                  | 0.0                | 1,593      | 213                                | 6.72E-04             | 4,693                | 238                 |
| L1MA4A   | 21                                                                                  | 0.0                | 1,170      | 290                                | 7.97E-04             | 5,823                | 334                 |
| Tigger3b | 26                                                                                  | 0.0                | 875        | 388                                | 8.30E-04             | 4,998                | 434                 |
| HERVH    | 25                                                                                  | 0.0                | 917        | 370                                | 8.89E-04             | 5,774                | 461                 |
| LTR33A   | 15                                                                                  | 0.0                | 1,844      | 184                                | 9.61E-04             | 3,521                | 174                 |



| category | # of probes significantly differentiating non-tumor adjacents and tumors (no pairs) | expected at random | enrichment | total number of probes in category | hyperGeometric p-val | # of genomic repeats | # of probed repeats |
|----------|-------------------------------------------------------------------------------------|--------------------|------------|------------------------------------|----------------------|----------------------|---------------------|
| MLT1A1   | 23                                                                                  | 0.0                | 1,019      | 333                                | 9.71E-04             | 6,611                | 371                 |
| L1M2     | 29                                                                                  | 0.0                | 749        | 453                                | 9.82E-04             | 9,352                | 524                 |
| MER57A   | 20                                                                                  | 0.0                | 1,229      | 276                                | 9.95E-04             | 2,633                | 323                 |
| L1M4b    | 27                                                                                  | 0.0                | 816        | 416                                | 1.11E-03             | 7,423                | 504                 |
| L1MA4    | 42                                                                                  | 0.1                | 463        | 733                                | 1.15E-03             | 8,983                | 824                 |
| L1MA10   | 21                                                                                  | 0.0                | 1,131      | 300                                | 1.23E-03             | 5,419                | 313                 |
| Tigger1  | 45                                                                                  | 0.1                | 422        | 805                                | 1.35E-03             | 11,928               | 951                 |
| LTR33    | 38                                                                                  | 0.1                | 517        | 656                                | 1.49E-03             | 9,302                | 668                 |
| L1MCb    | 11                                                                                  | 0.0                | 2,759      | 123                                | 1.51E-03             | 2,863                | 147                 |
| MER94    | 17                                                                                  | 0.0                | 1,475      | 230                                | 1.61E-03             | 4,680                | 232                 |
| L1PA13   | 25                                                                                  | 0.0                | 872        | 389                                | 1.80E-03             | 10,722               | 410                 |
| MLT1E2   | 15                                                                                  | 0.0                | 1,731      | 196                                | 1.85E-03             | 3,960                | 213                 |
| L1PB1    | 30                                                                                  | 0.0                | 683        | 497                                | 2.09E-03             | 11,421               | 532                 |
| MER39    | 20                                                                                  | 0.0                | 1,124      | 302                                | 2.96E-03             | 3,125                | 339                 |
| AcHobo   | 56                                                                                  | 0.2                | 311        | 1,092                              | 3.05E-03             | 18,762               | 1,106               |
| MLT1J    | 64                                                                                  | 0.2                | 265        | 1,280                              | 3.12E-03             | 15,375               | 1,332               |
| L1ME3A   | 56                                                                                  | 0.2                | 309        | 1,097                              | 3.35E-03             | 16,330               | 1,269               |
| L1MD1    | 27                                                                                  | 0.0                | 752        | 451                                | 3.53E-03             | 6,126                | 523                 |
| MER4D    | 16                                                                                  | 0.0                | 1,482      | 229                                | 3.67E-03             | 1,275                | 259                 |
| MER103   | 22                                                                                  | 0.0                | 967        | 351                                | 4.04E-03             | 6,812                | 348                 |
| MSTD     | 23                                                                                  | 0.0                | 910        | 373                                | 4.23E-03             | 7,421                | 412                 |
| LTR12_   | 11                                                                                  | 0.0                | 2,406      | 141                                | 4.67E-03             | 664                  | 136                 |
| THE1C    | 20                                                                                  | 0.0                | 1,064      | 319                                | 5.52E-03             | 9,731                | 330                 |
| MLT1A0   | 51                                                                                  | 0.2                | 335        | 1,014                              | 6.23E-03             | 20,156               | 1,102               |
| L1PA10   | 17                                                                                  | 0.0                | 1,290      | 263                                | 6.59E-03             | 6,962                | 271                 |
| MLT1J2   | 21                                                                                  | 0.0                | 984        | 345                                | 6.60E-03             | 7,867                | 331                 |
| L1MD2    | 44                                                                                  | 0.1                | 395        | 858                                | 7.07E-03             | 12,388               | 990                 |

| category   | # of probes significantly differentiating non-tumor adjacents and tumors (no pairs) | expected at random | enrichment | total number of probes in category | hyperGeometric p-val | # of genomic repeats | # of probed repeats |
|------------|-------------------------------------------------------------------------------------|--------------------|------------|------------------------------------|----------------------|----------------------|---------------------|
| L1MA8      | 29                                                                                  | 0.0                | 650        | 522                                | 7.63E-03             | 9,992                | 576                 |
| MER57A-int | 9                                                                                   | 0.0                | 2,900      | 117                                | 9.06E-03             | 1,965                | 146                 |
| Mariner    | 47                                                                                  | 0.1                | 361        | 941                                | 9.07E-03             | 16,055               | 984                 |
| MER4A      | 19                                                                                  | 0.0                | 1,084      | 313                                | 9.07E-03             | 1,084                | 366                 |
| MIR3       | 213                                                                                 | 3.2                | 66         | 5,136                              | 1.05E-02             | 70,044               | 4,603               |
| LTR9       | 18                                                                                  | 0.0                | 1,139      | 298                                | 1.10E-02             | 1,919                | 314                 |
| MLT2B1     | 12                                                                                  | 0.0                | 1,917      | 177                                | 1.11E-02             | 4,186                | 191                 |
| L1PA6      | 13                                                                                  | 0.0                | 1,722      | 197                                | 1.13E-02             | 5,617                | 201                 |
| L1MEe      | 37                                                                                  | 0.1                | 471        | 720                                | 1.13E-02             | 12,492               | 890                 |
| THE1B      | 33                                                                                  | 0.1                | 539        | 630                                | 1.17E-02             | 22,106               | 659                 |
| MLT2A2     | 8                                                                                   | 0.0                | 3,263      | 104                                | 1.20E-02             | 3,754                | 106                 |
| HERV16     | 11                                                                                  | 0.0                | 2,108      | 161                                | 1.28E-02             | 4,493                | 183                 |
| L1MEc      | 56                                                                                  | 0.2                | 288        | 1,179                              | 1.35E-02             | 21,328               | 1,421               |
| L1MA3      | 25                                                                                  | 0.0                | 741        | 458                                | 1.41E-02             | 8,131                | 490                 |
| LTR16B     | 12                                                                                  | 0.0                | 1,834      | 185                                | 1.55E-02             | 3,456                | 183                 |
| PiggyBac   | 9                                                                                   | 0.0                | 2,630      | 129                                | 1.71E-02             | 2,068                | 138                 |
| DNA        | 948                                                                                 | 69.9               | 14         | 25,027                             | 1.84E-02             | 386,466              | 28,225              |
| CR1        | 135                                                                                 | 1.3                | 106        | 3,198                              | 2.00E-02             | 54,846               | 3,185               |
| MER50      | 19                                                                                  | 0.0                | 998        | 340                                | 2.05E-02             | 2,576                | 390                 |
| MER2_type  | 206                                                                                 | 3.1                | 67         | 5,048                              | 2.05E-02             | 81,748               | 5,863               |
| MLT1E      | 30                                                                                  | 0.1                | 577        | 588                                | 2.06E-02             | 3,378                | 660                 |
| MER2       | 287                                                                                 | 6.1                | 47         | 7,202                              | 2.25E-02             | 8,174                | 8,171               |
| L1P3       | 11                                                                                  | 0.0                | 1,928      | 176                                | 2.41E-02             | 4,518                | 184                 |
| MIRm       | 108                                                                                 | 0.8                | 134        | 2,528                              | 2.45E-02             | 32,156               | 2,288               |
| L1M1       | 25                                                                                  | 0.0                | 704        | 482                                | 2.49E-02             | 10,118               | 540                 |
| LTR1       | 165                                                                                 | 1.9                | 85         | 4,006                              | 2.54E-02             | 1,396                | 4,070               |

| category | # of probes significantly differentiating non-tumor adjacents and tumors (no pairs) | expected at random | enrichment | total number of probes in category | hyperGeometric p-val | # of genomic repeats | # of probed repeats |
|----------|-------------------------------------------------------------------------------------|--------------------|------------|------------------------------------|----------------------|----------------------|---------------------|
| MER6     | 84                                                                                  | 0.5                | 177        | 1,922                              | 2.55E-02             | 926                  | 2,123               |
| MER8     | 41                                                                                  | 0.1                | 393        | 864                                | 2.77E-02             | 1,884                | 891                 |
| ERVL-E   | 21                                                                                  | 0.0                | 855        | 397                                | 2.84E-02             | 9,525                | 453                 |
| L1PB4    | 17                                                                                  | 0.0                | 1,095      | 310                                | 2.99E-02             | 6,330                | 328                 |
| MER39B   | 7                                                                                   | 0.0                | 3,294      | 103                                | 3.07E-02             | 1,166                | 113                 |
| LTR67    | 17                                                                                  | 0.0                | 1,091      | 311                                | 3.07E-02             | 6,289                | 306                 |
| FAM      | 31                                                                                  | 0.1                | 537        | 632                                | 3.08E-02             | 4,424                | 525                 |
| MLT1I    | 26                                                                                  | 0.0                | 655        | 518                                | 3.27E-02             | 11,191               | 533                 |
| MER4A1   | 13                                                                                  | 0.0                | 1,495      | 227                                | 3.34E-02             | 2,150                | 267                 |
| L1PA14   | 9                                                                                   | 0.0                | 2,356      | 144                                | 3.35E-02             | 3,561                | 160                 |
| MLT2B3   | 8                                                                                   | 0.0                | 2,693      | 126                                | 3.63E-02             | 2,966                | 126                 |
| MLT1F    | 33                                                                                  | 0.1                | 490        | 692                                | 3.84E-02             | 4,498                | 769                 |
| L1MC5    | 67                                                                                  | 0.3                | 220        | 1,544                              | 4.42E-02             | 20,412               | 1,780               |
| AluYg    | 19                                                                                  | 0.0                | 915        | 371                                | 4.47E-02             | 111                  | 363                 |
| L1MA5    | 20                                                                                  | 0.0                | 857        | 396                                | 4.67E-02             | 4,086                | 435                 |
| MIRb     | 736                                                                                 | 42.4               | 17         | 19,543                             | 4.77E-02             | 278,083              | 19,026              |
| MADE2    | 9                                                                                   | 0.0                | 2,203      | 154                                | 4.91E-02             | 2,609                | 139                 |
| LTR49    | 9                                                                                   | 0.0                | 2,203      | 154                                | 4.91E-02             | 1,406                | 182                 |

**Table S4.**

A compilation of annotation about the tissue samples analyzed in this manuscript.

| id    | age | sex | ethnicity           | tob | tob_q<br>uit | etoh | etoh_q<br>uit | hvp | diagnosis | primary_lo<br>cation             | differentiation | t   | n   |
|-------|-----|-----|---------------------|-----|--------------|------|---------------|-----|-----------|----------------------------------|-----------------|-----|-----|
| dk-11 | 64  | M   | n/a                 | yes | yes          | yes  | no            | neg | scc       | oral<br>cavity:mand<br>ible      | poor            | t2  | n0  |
| dk-12 | 59  | M   | n/a                 | yes | yes          | yes  | no            | neg | scc       | oral<br>cavity:tong<br>ue        | moderate        | t4  | n2b |
| dk-14 | 71  | M   | caucasian           | yes | no           | yes  | no            | neg | scc       | larynx:cord                      | well            | t1a | n0  |
| dk-15 | 49  | M   | caucasian           | yes | no           | yes  | no            | pos | scc       | oral<br>pharynx:bot              | moderate        | t2  | n0  |
| dk-16 | 49  | F   | african<br>american | n/a | n/a          | n/a  | n/a           | neg | scc       | oral<br>pharynx:bot              | moderate        | n/a | n/a |
| dk-17 | 66  | M   | caucasian           | yes | yes          | yes  | yes           | neg | scc       | oral<br>pharynx:ton<br>sil       | moderate        | t3  | n1  |
| dk-19 | 76  | M   | caucasian           | yes | yes          | n/a  | n/a           | neg | scc       | larynx:cord                      | moderate        | t2  | n0  |
| dk-21 | 86  | F   | caucasian           | yes | yes          | n/a  | n/a           | neg | scc       | oral<br>cavity:mand<br>ible      | poor            | t4  | n2b |
| dk-22 | 65  | F   | caucasian           | yes | no           | n/a  | n/a           | neg | scc       | larynx:sub                       | moderate        | t4  | n1  |
| dk-23 | 79  | M   | n/a                 | yes | no           | yes  | no            | neg | scc       | oral<br>cavity:mand<br>ible      | moderate        | t3  | n0  |
| dk-26 | 80  | M   | caucasian           | yes | no           | n/a  | n/a           | neg | scc       | oral<br>cavity:tong<br>ue        | moderate        | t2  | n1  |
| dk-27 | 66  | M   | caucasian           | yes | no           | yes  | no            | neg | scc       | hypopharyn<br>x:ps               | moderate        | t3  | n1  |
| dk-3  | 76  | F   | african<br>american | yes | yes          | yes  | yes           | neg | scc       | oral<br>cavity:fom               | moderate        | t2  | n2a |
| dk-32 | 85  | M   | n/a                 | n/a | n/a          | n/a  | n/a           | n/a | scc       | larynx:supr<br>a                 | moderate        | n/a | n/a |
| dk-33 | 41  | M   | caucasian           | yes | yes          | yes  | yes           | n/a | scc       | larynx:cord                      | moderate        | t1  | n0  |
| dk-34 | 64  | F   | caucasian           | yes | no           | n/a  | n/a           | n/a | scc       | oral<br>cavity:mand<br>ible      | moderate        | t2  | n2  |
| dk-4  | 51  | F   | n/a                 | yes | no           | n/a  | n/a           | neg | scc       | oral<br>pharynx:s.p<br>alate     | moderate        | t3  | n2c |
| dk-48 | 92  | M   | caucasian           | yes | yes          | n/a  | n/a           | n/a | scc       | oral<br>cavity:lip               | moderate        | t2  | n1  |
| dk-50 | 75  | M   | caucasian           | yes | yes          | yes  | no            | n/a | carcinoma | oral<br>cavity:bucc<br>al mucosa | poor            | t2  | n0  |
| dk-52 | 69  | M   | caucasian           | yes | no           | yes  | no            | n/a | scc       | oral<br>pharynx:ps               | moderate        | t2  | n0  |
| dk-54 | 52  | M   | african<br>american | yes | no           | yes  | no            | n/a | scc       | larynx:glotti<br>s               | moderate        | t3  | n0  |
| dk-58 | 51  | M   | n/a                 | yes | no           | yes  | no            | n/a | scc       | oral<br>pharynx:ton<br>sil, bot  | poor            | t4  | n1  |

| id    | age | sex | ethnicity           | tob | tob_q<br>uit | etoh | etoh_q<br>uit | hvp | diagnosis | primary_lo<br>cation                       | differentiation | t   | n   |
|-------|-----|-----|---------------------|-----|--------------|------|---------------|-----|-----------|--------------------------------------------|-----------------|-----|-----|
| dk-6  | 78  | F   | african<br>american | n/a | n/a          | n/a  | n/a           | neg | scc       | oral<br>cavity:gingi<br>va                 | well            | t4  | n2c |
| dk-62 | 65  | M   | indian (india)      | yes | yes          | n/a  | n/a           | n/a | scc       | oral<br>cavity:mand<br>ible                | moderate        | t4  | n2b |
| dk-66 | 56  | M   | n/a                 | n/a | n/a          | n/a  | n/a           | n/a | scc       | oral<br>cavity:tongi<br>ue                 | mod. to poor    | t3  | n1  |
| dk-69 | 62  | M   | hispanic            | yes | no           | yes  | no            | n/a | scc       | oral<br>cavity:mand<br>ible                | moderate        | t4  | n0  |
| dk-7  | 58  | M   | n/a                 | yes | no           | yes  | no            | pos | scc       | oral<br>cavity:tongi<br>ue                 | in-situ         | n/a | n1  |
| dk-9  | 51  | M   | caucasian           | yes | yes          | yes  | no            | pos | scc       | oral<br>pharynx:bot                        | moderate        | t3  | n0  |
| dk-a  | 57  | M   | caucasian           | yes | no           | yes  | no            | neg | scc       | oral<br>cavity:fom                         | moderate        | t3  | n2c |
| dk-h  | 77  | M   | n/a                 | yes | no           | yes  | no            | neg | scc       | oral<br>cavity:tongi<br>ue                 | poor            | t2  | n0  |
| dk-n  | 68  | M   | n/a                 | yes | no           | yes  | no            | neg | scc       | larynx:supr<br>a                           | poor            | t2  | n2c |
| dk-o  | 73  | M   | african<br>american | yes | yes          | n/a  | n/a           | n/a | scc       | oral<br>pharynx:bot<br>, palate,<br>tonsil | poor            | t3  | n0  |
| dk-t  | 80  | M   | n/a                 | yes | no           | n/a  | n/a           | neg | scc       | larynx:cord                                | moderate        | t1  | n0  |
| dk-x  | 57  | M   | caucasian           | yes | no           | yes  | yes           | neg | scc       | larynx:cord                                | poor            | t4  | n0  |
| no-12 | 38  | F   | n/a                 | n/a | n/a          | n/a  | n/a           | n/a | n/a       | n/a                                        | n/a             | n/a | n/a |
| no-15 | 32  | M   | n/a                 | n/a | n/a          | n/a  | n/a           | n/a | n/a       | n/a                                        | n/a             | n/a | n/a |
| no-18 | 43  | F   | n/a                 | n/a | n/a          | n/a  | n/a           | n/a | n/a       | n/a                                        | n/a             | n/a | n/a |
| no-19 | 29  | M   | n/a                 | n/a | n/a          | n/a  | n/a           | n/a | n/a       | n/a                                        | n/a             | n/a | n/a |
| no-22 | 31  | M   | n/a                 | n/a | n/a          | n/a  | n/a           | n/a | n/a       | n/a                                        | n/a             | n/a | n/a |
| no-23 | 34  | M   | n/a                 | n/a | n/a          | n/a  | n/a           | n/a | n/a       | n/a                                        | n/a             | n/a | n/a |
| no-24 | 37  | M   | n/a                 | n/a | n/a          | n/a  | n/a           | n/a | n/a       | n/a                                        | n/a             | n/a | n/a |
| no-6  | 62  | M   | n/a                 | n/a | n/a          | n/a  | n/a           | n/a | n/a       | n/a                                        | n/a             | n/a | n/a |
| no-7  | 42  | F   | n/a                 | n/a | n/a          | n/a  | n/a           | n/a | n/a       | n/a                                        | n/a             | n/a | n/a |
| no-9  | 33  | M   | n/a                 | n/a | n/a          | n/a  | n/a           | n/a | n/a       | n/a                                        | n/a             | n/a | n/a |
