# Supplementary material
Source: PubMed Central journal article supplement (PMC2783545)

# alignment, CG content and conservation of a random 60 AluJb(s)

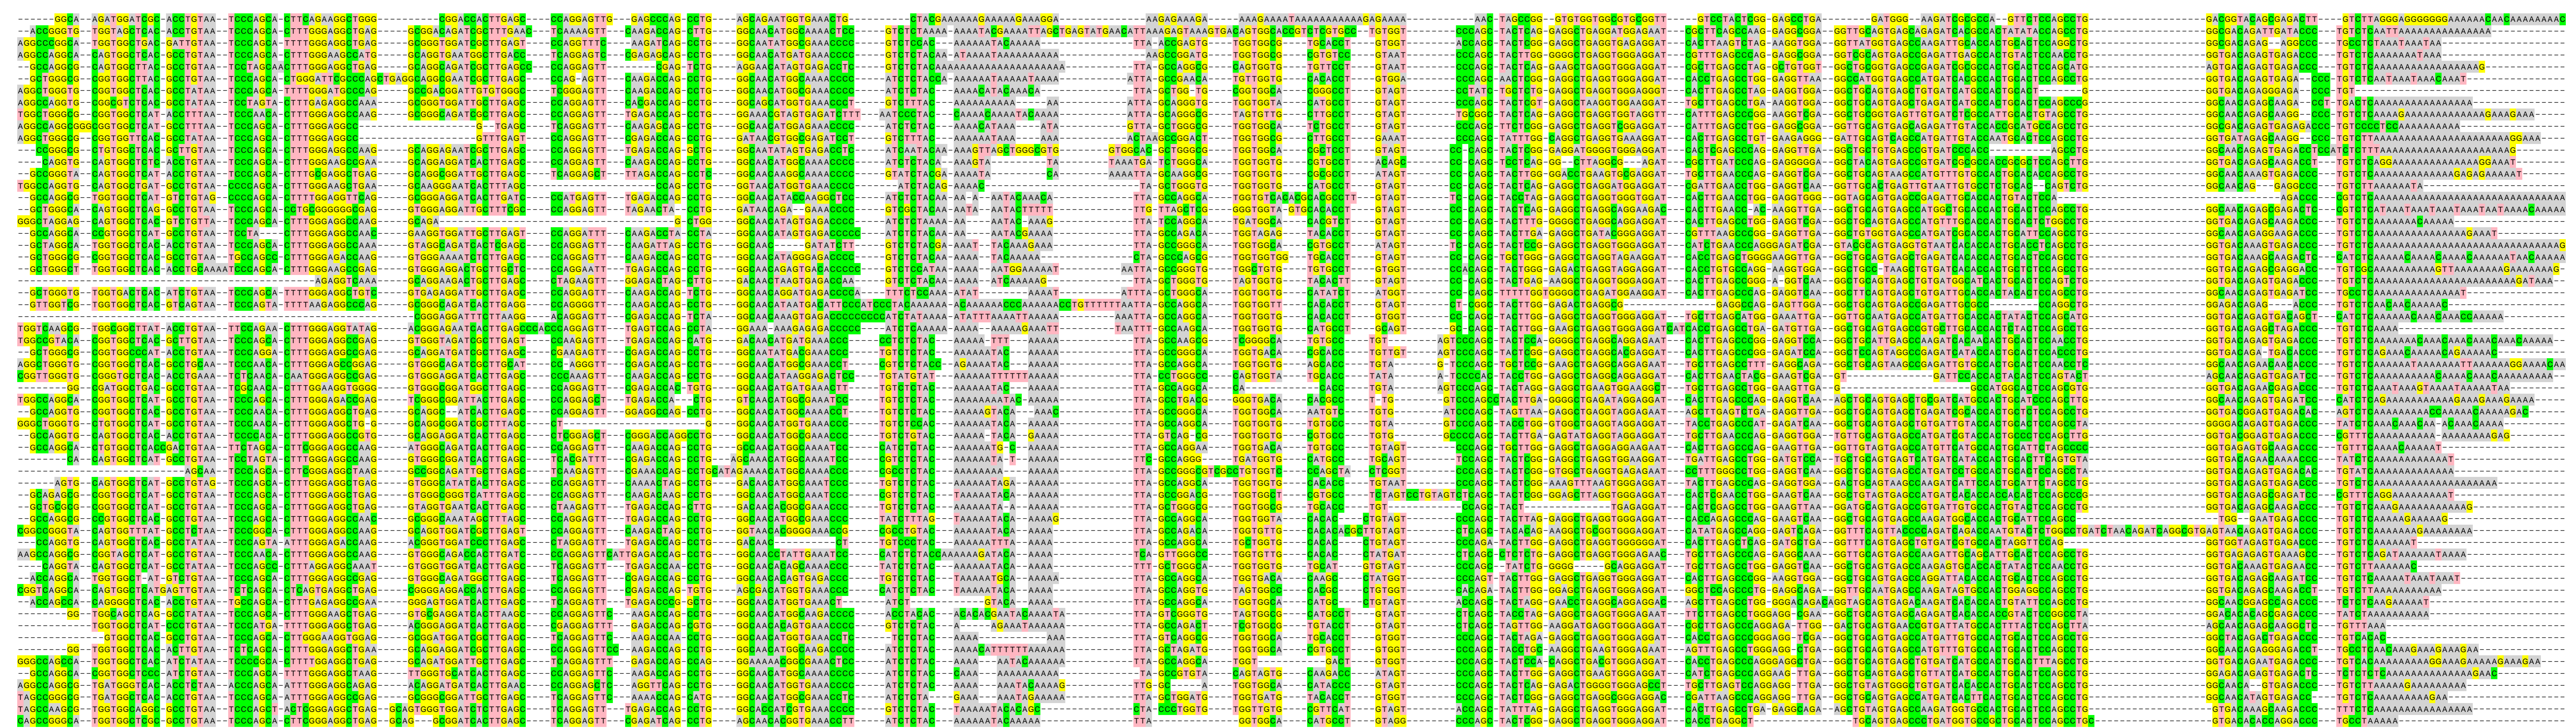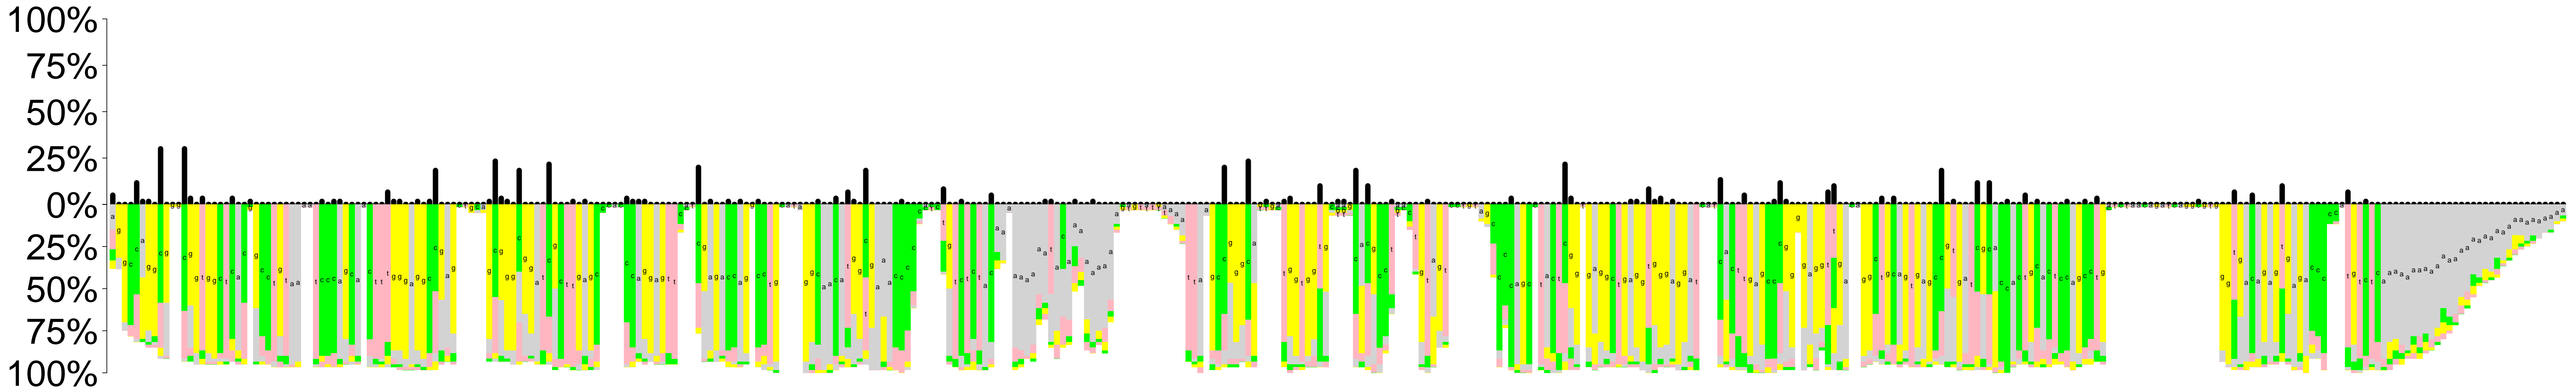

Supplement: NIHMS142127-supplement-05.pdf [file NIHMS142127-supplement-05.pdf]

# alignment, CG content and conservation of a random 60 AluJo(s)

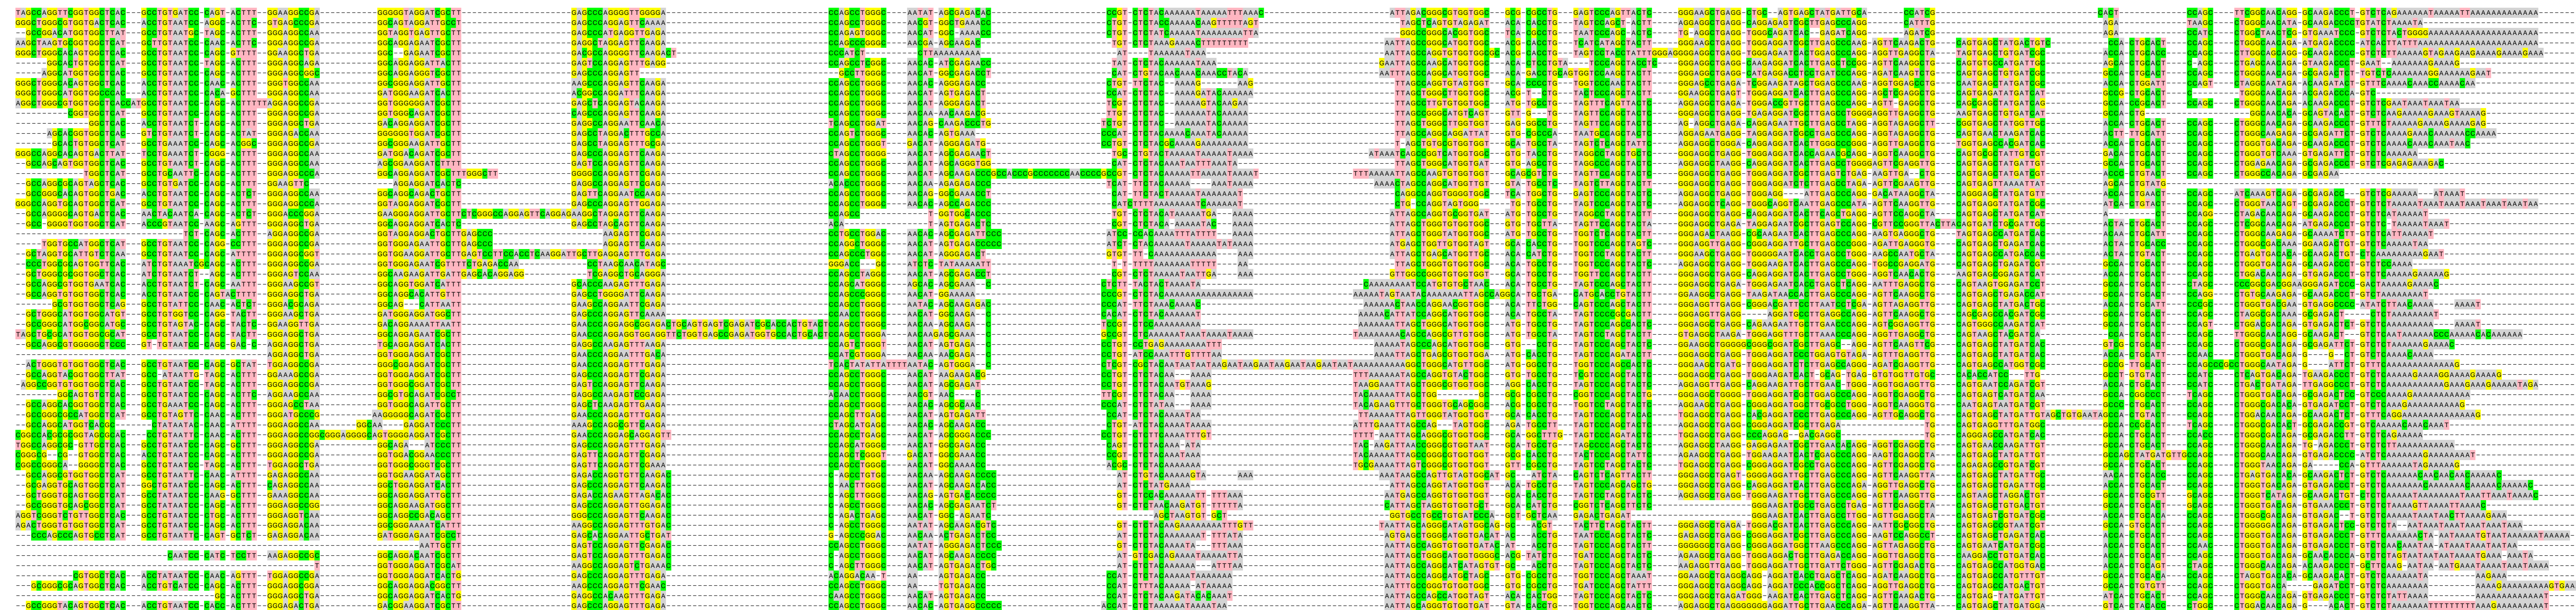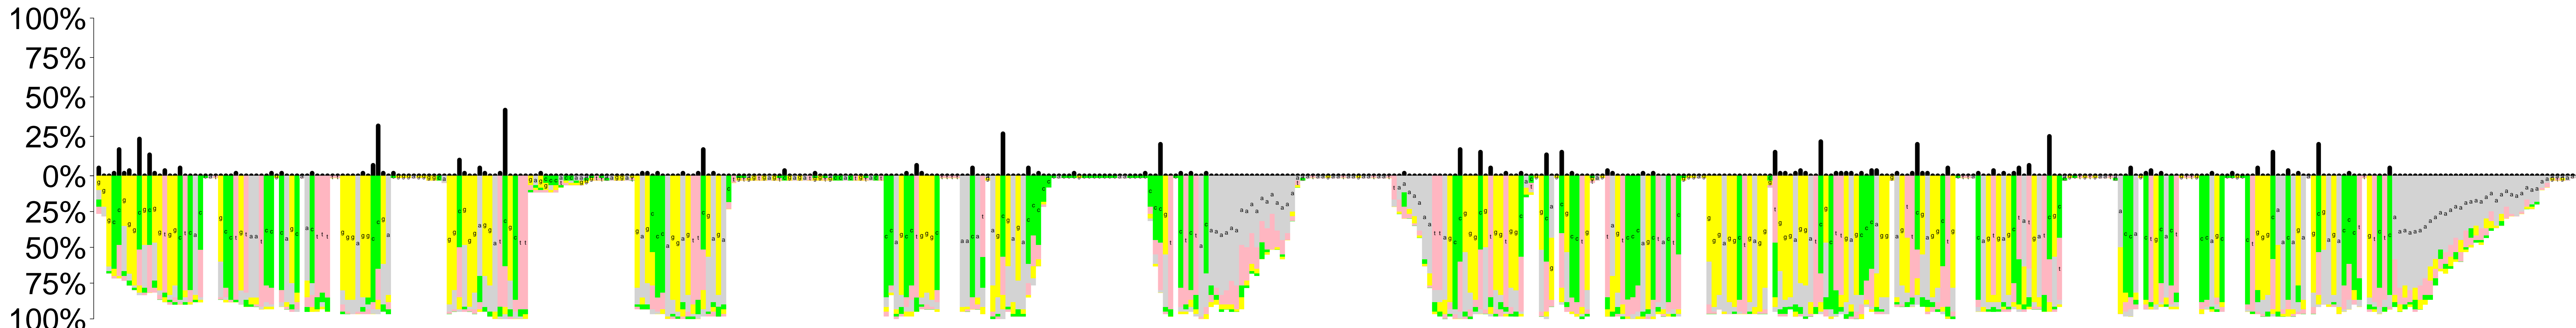

Supplement: NIHMS142127-supplement-06.pdf [file NIHMS142127-supplement-06.pdf]

# alignment, CG content and conservation of a random 60 AluSc(s)

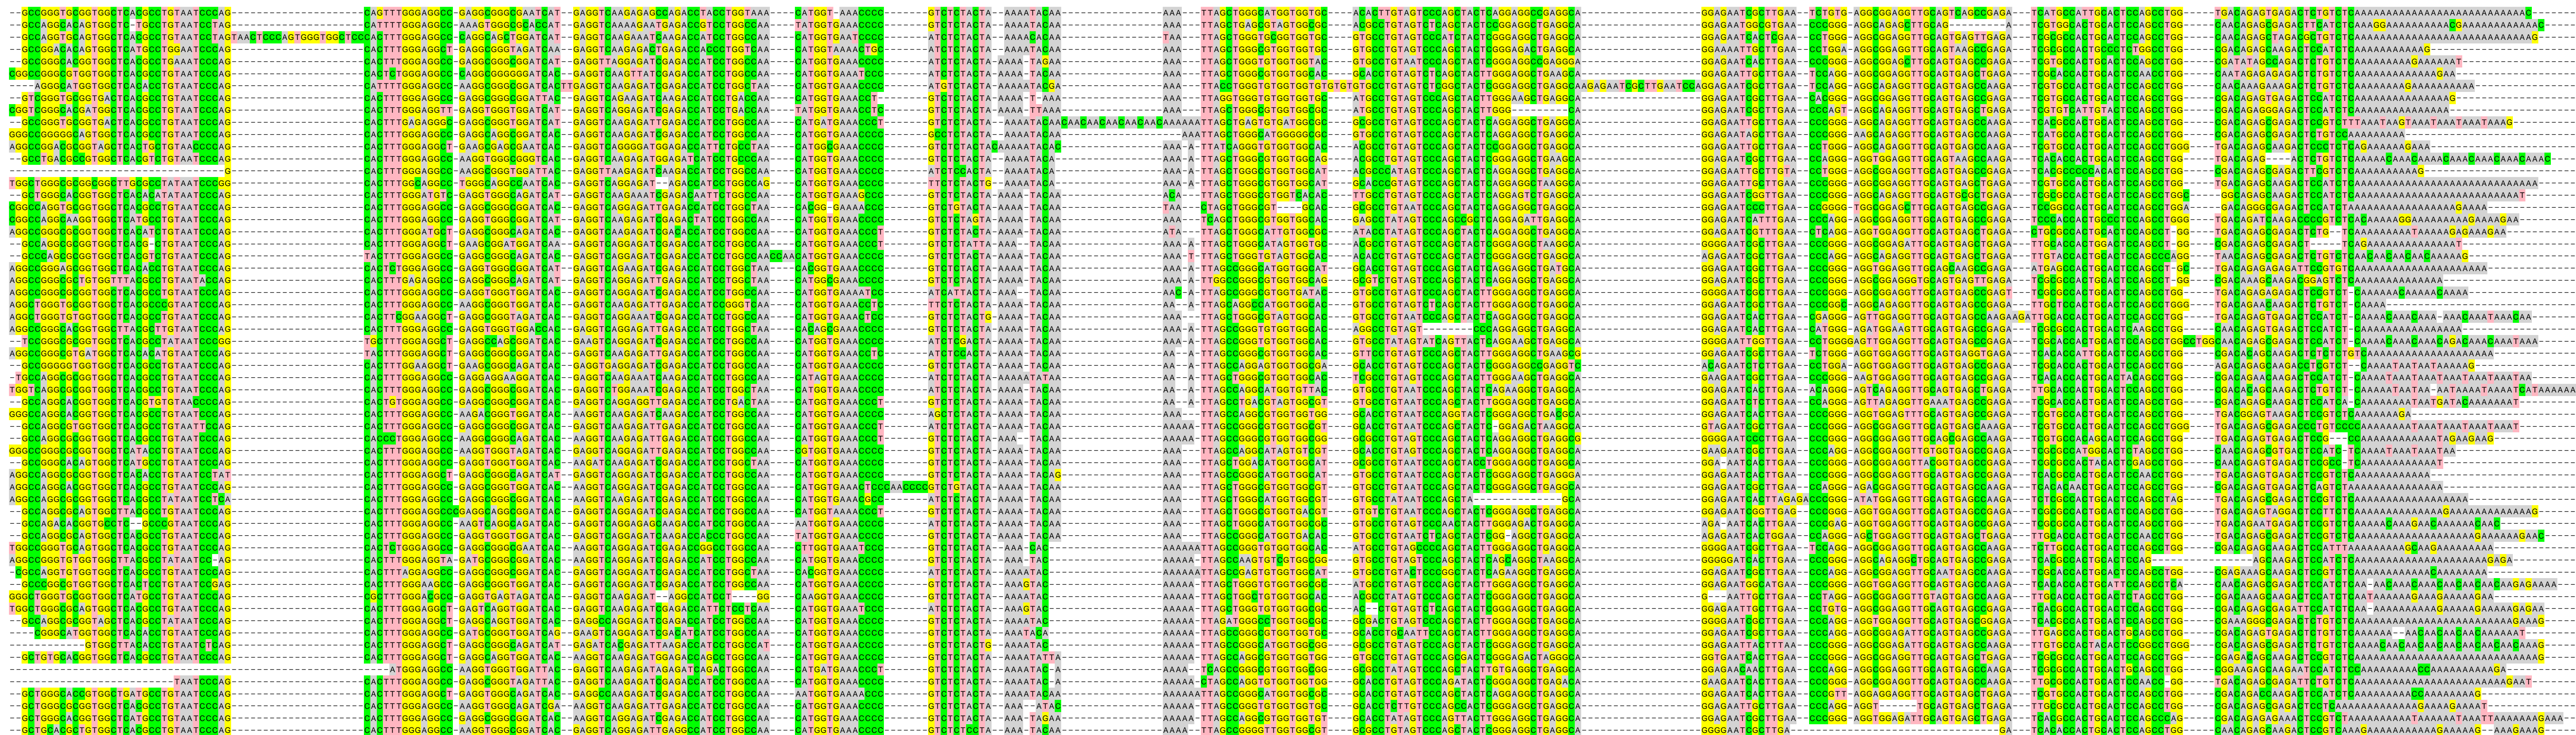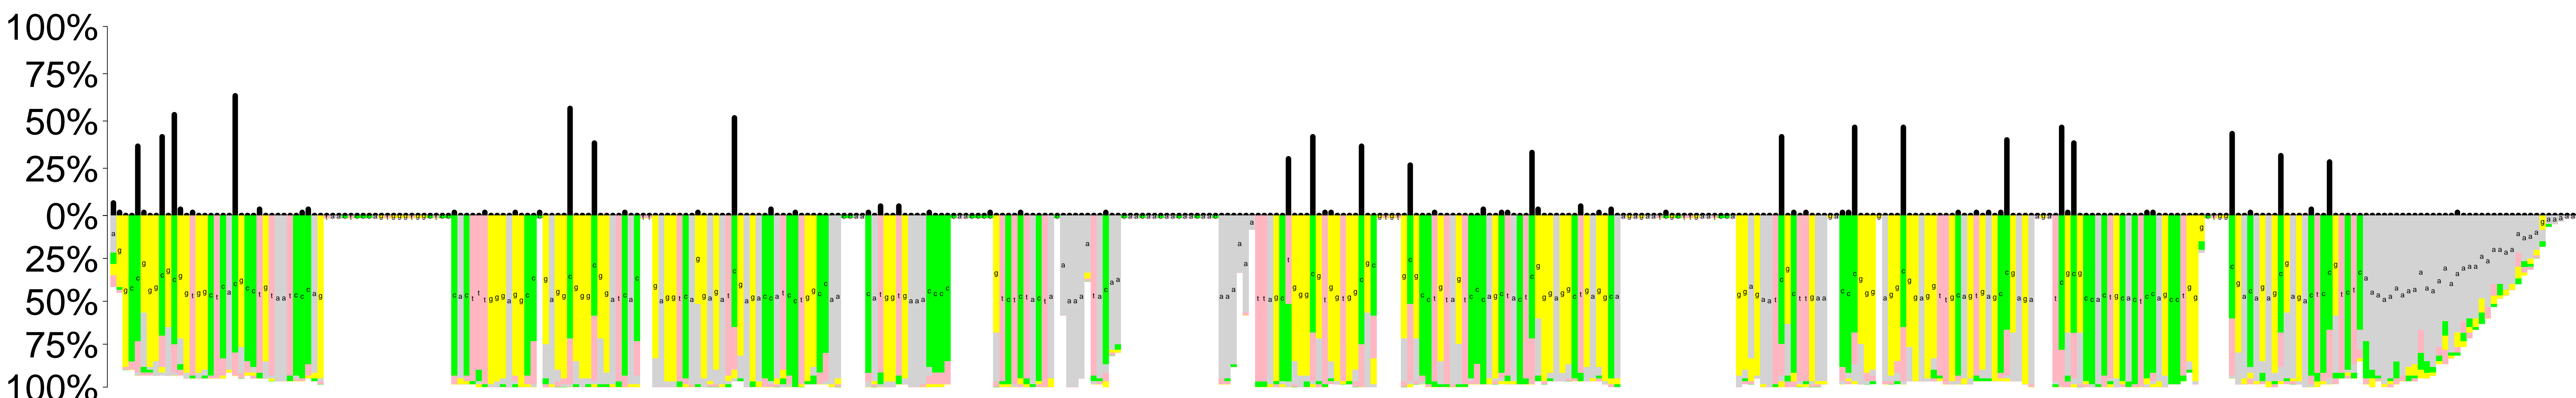

Supplement: NIHMS142127-supplement-07.pdf [file NIHMS142127-supplement-07.pdf]

# alignment, CG content and conservation of a random 60 AluSg(s)

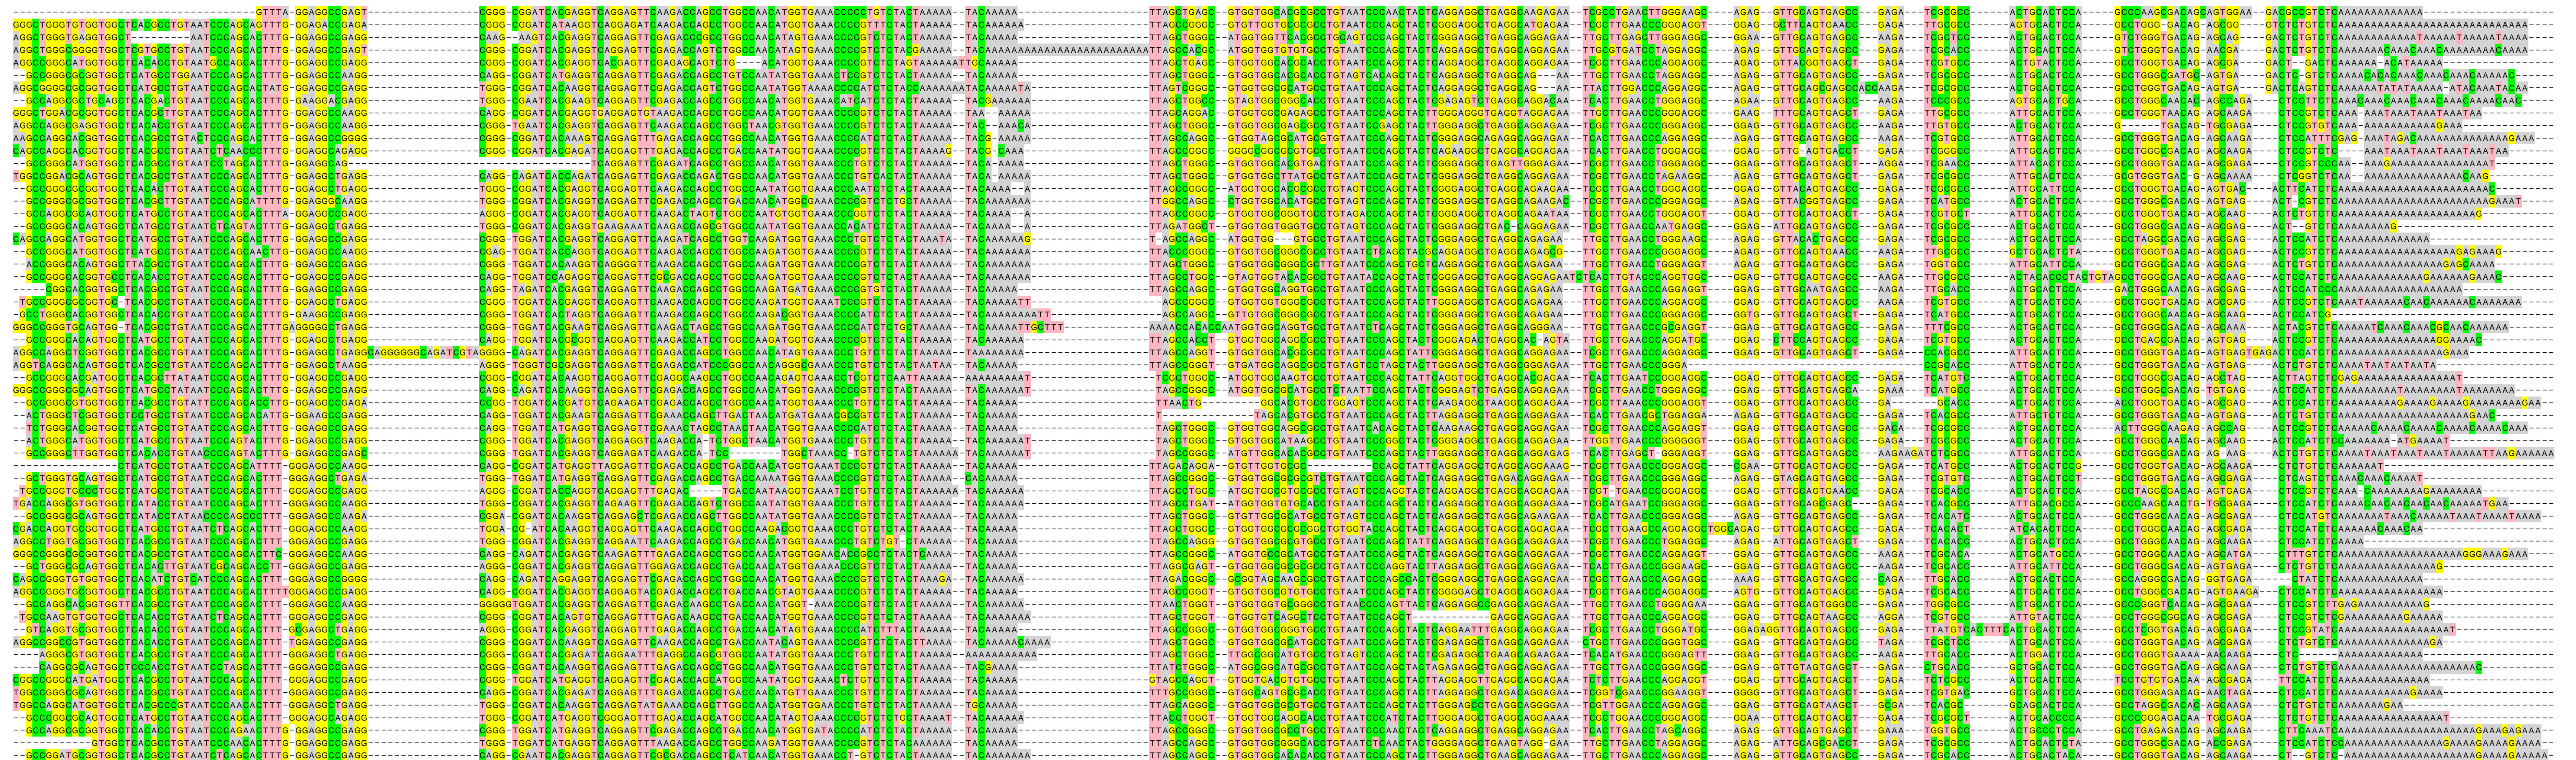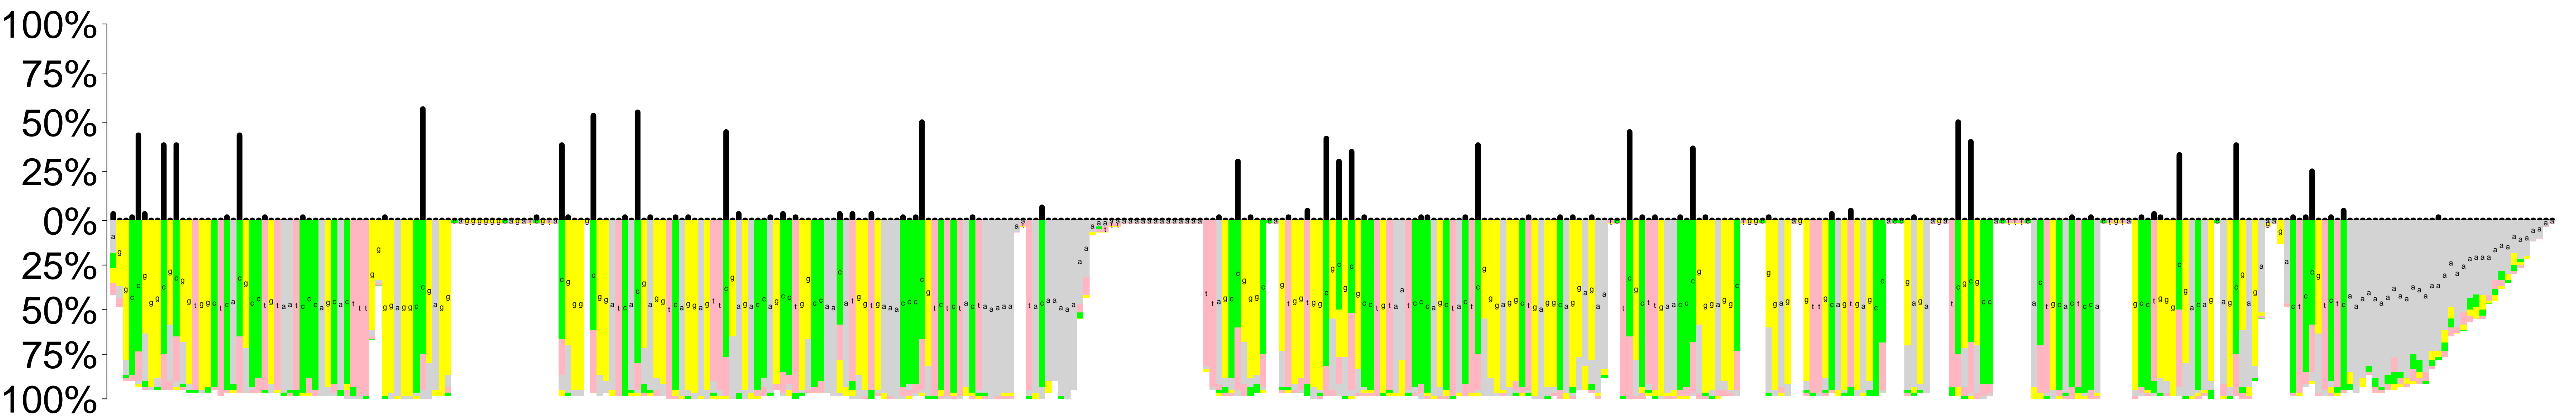

Supplement: NIHMS142127-supplement-08.pdf [file NIHMS142127-supplement-08.pdf]

# alignment, CG content and conservation of a random 60 AluSg1(s)

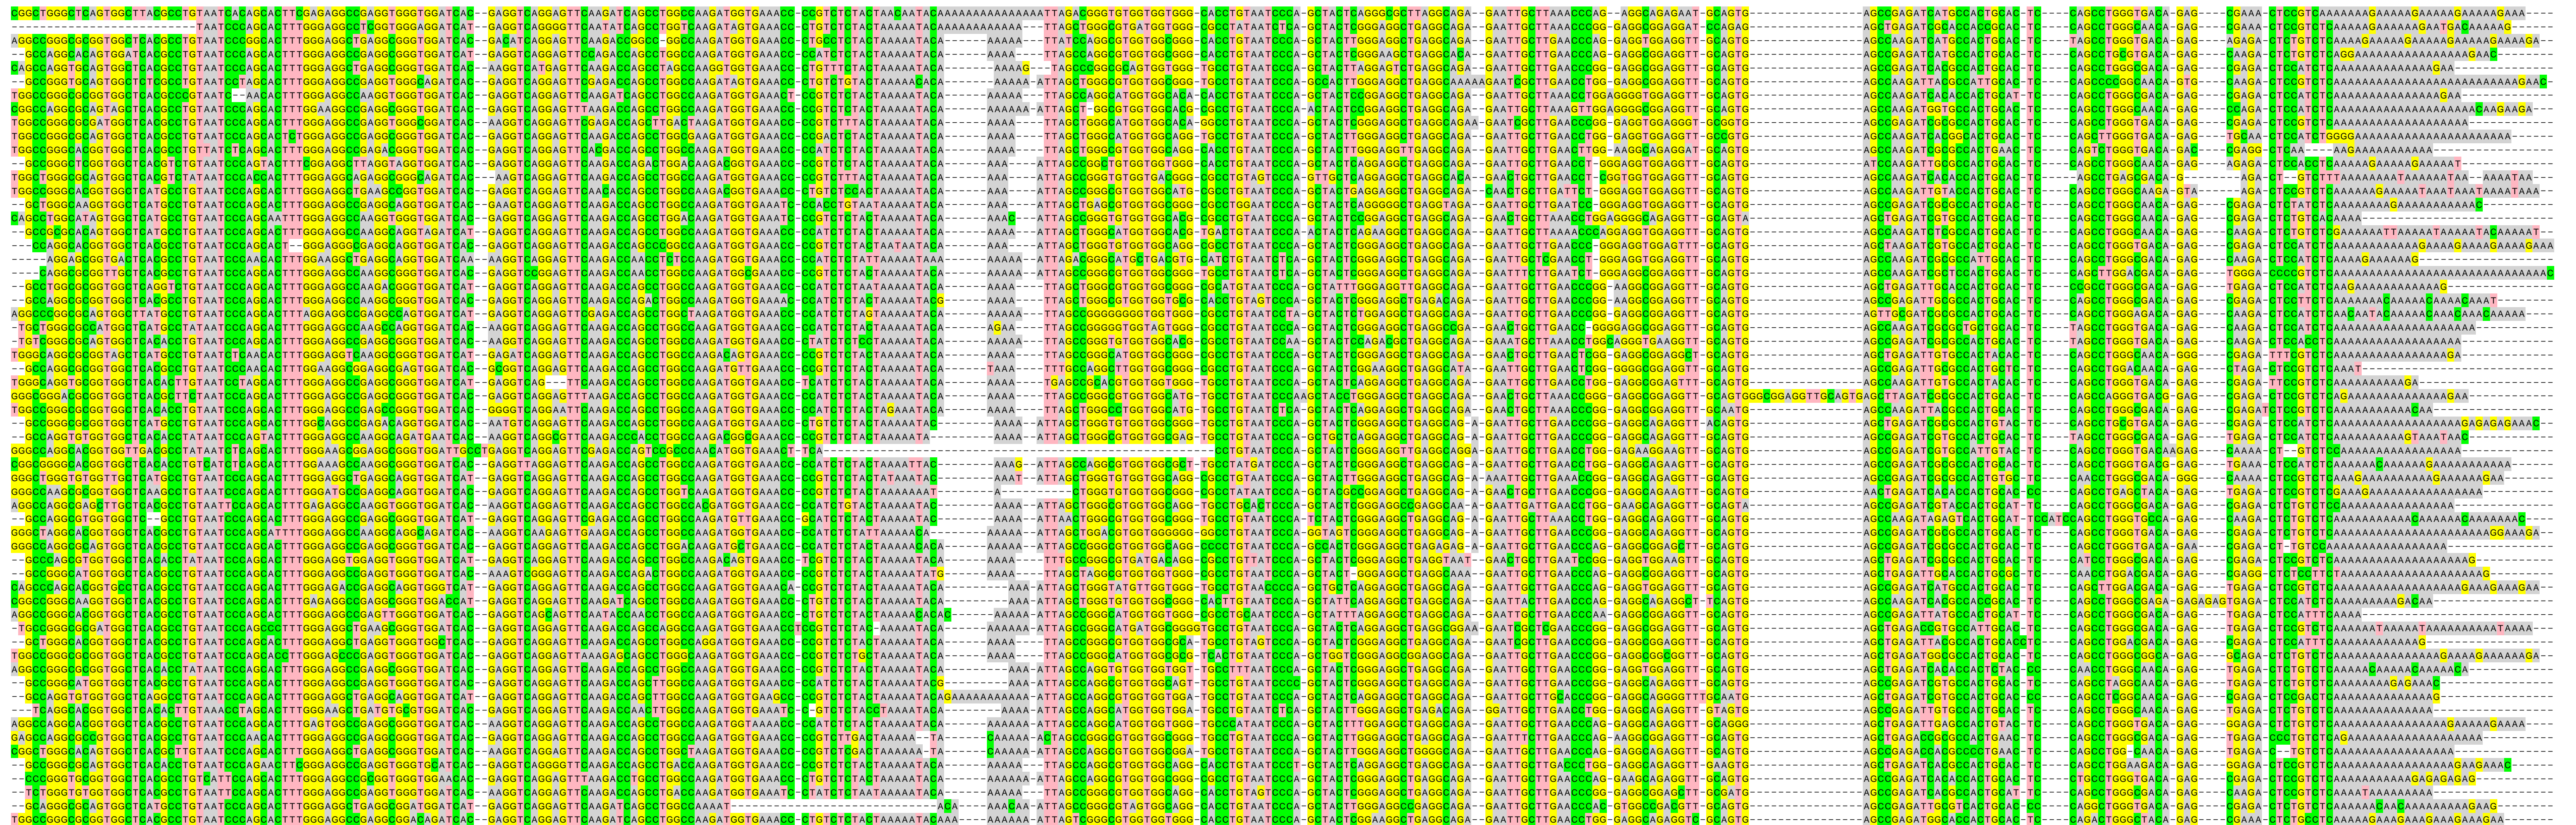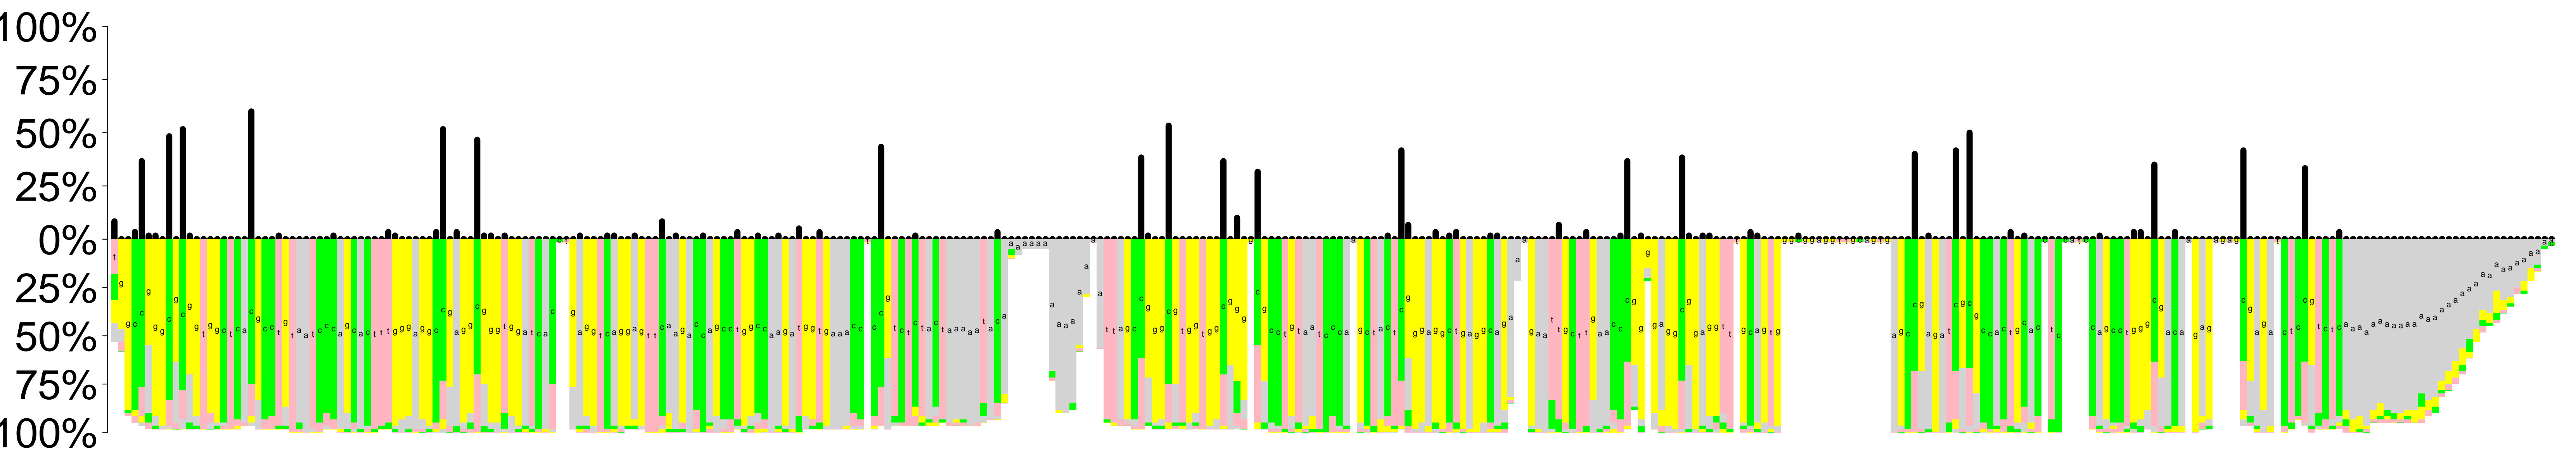

Supplement: NIHMS142127-supplement-09.pdf [file NIHMS142127-supplement-09.pdf]

# alignment, CG content and conservation of a random 60 AluSp(s)

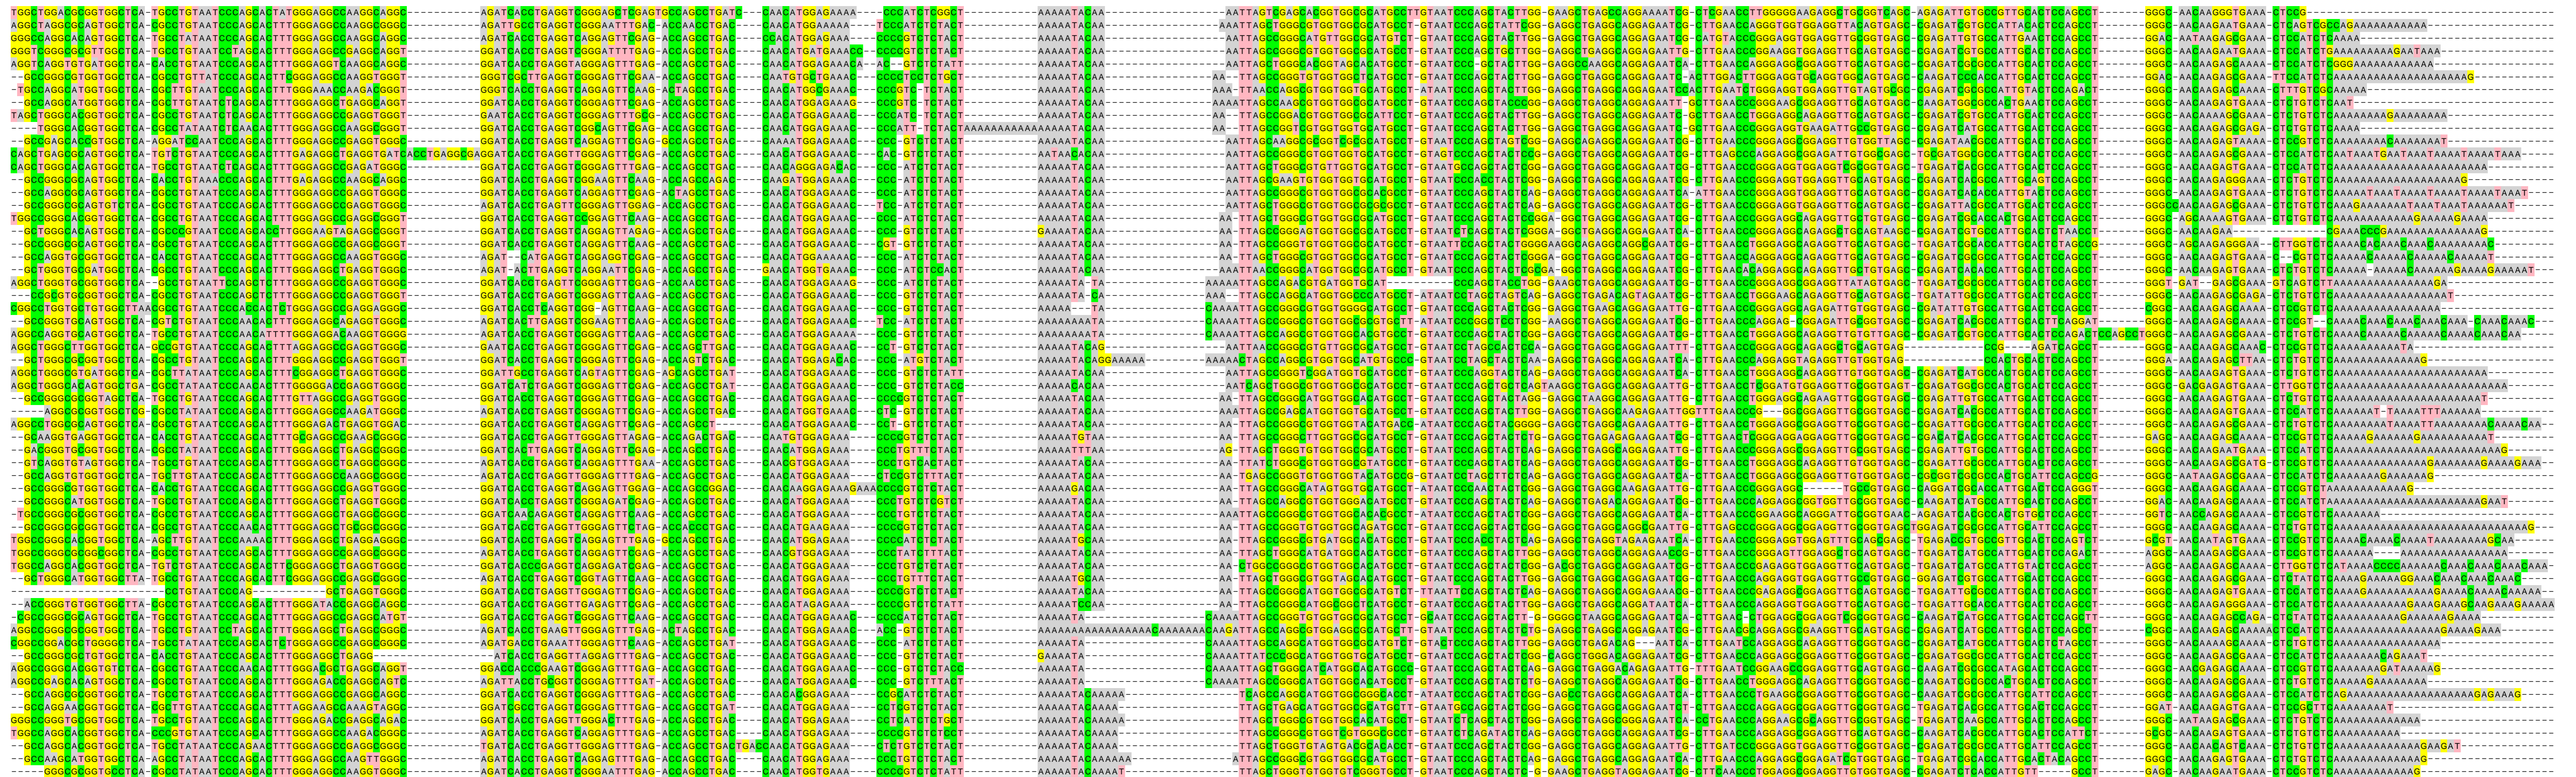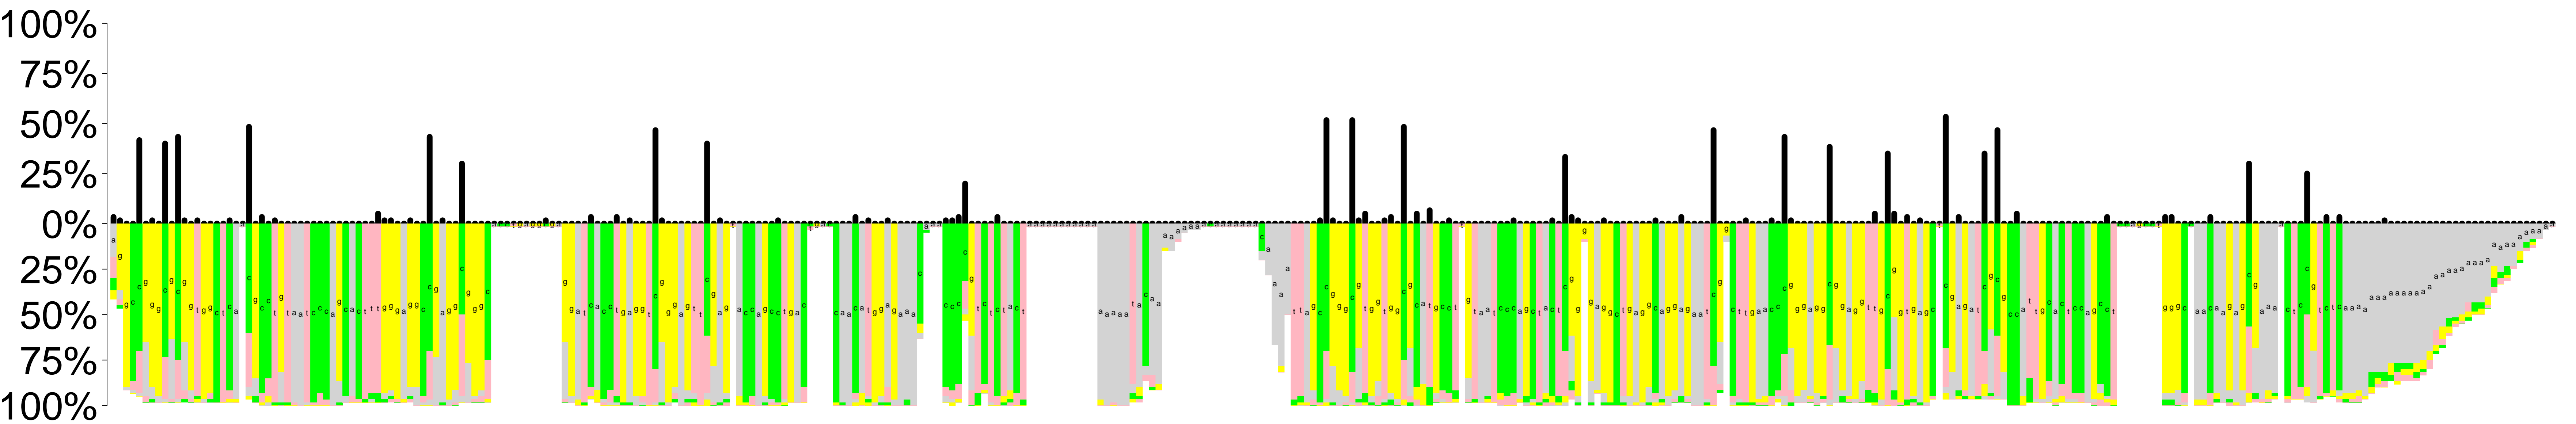

Supplement: NIHMS142127-supplement-10.pdf [file NIHMS142127-supplement-10.pdf]

# alignment, CG content and conservation of a random 60 AluSq(s)

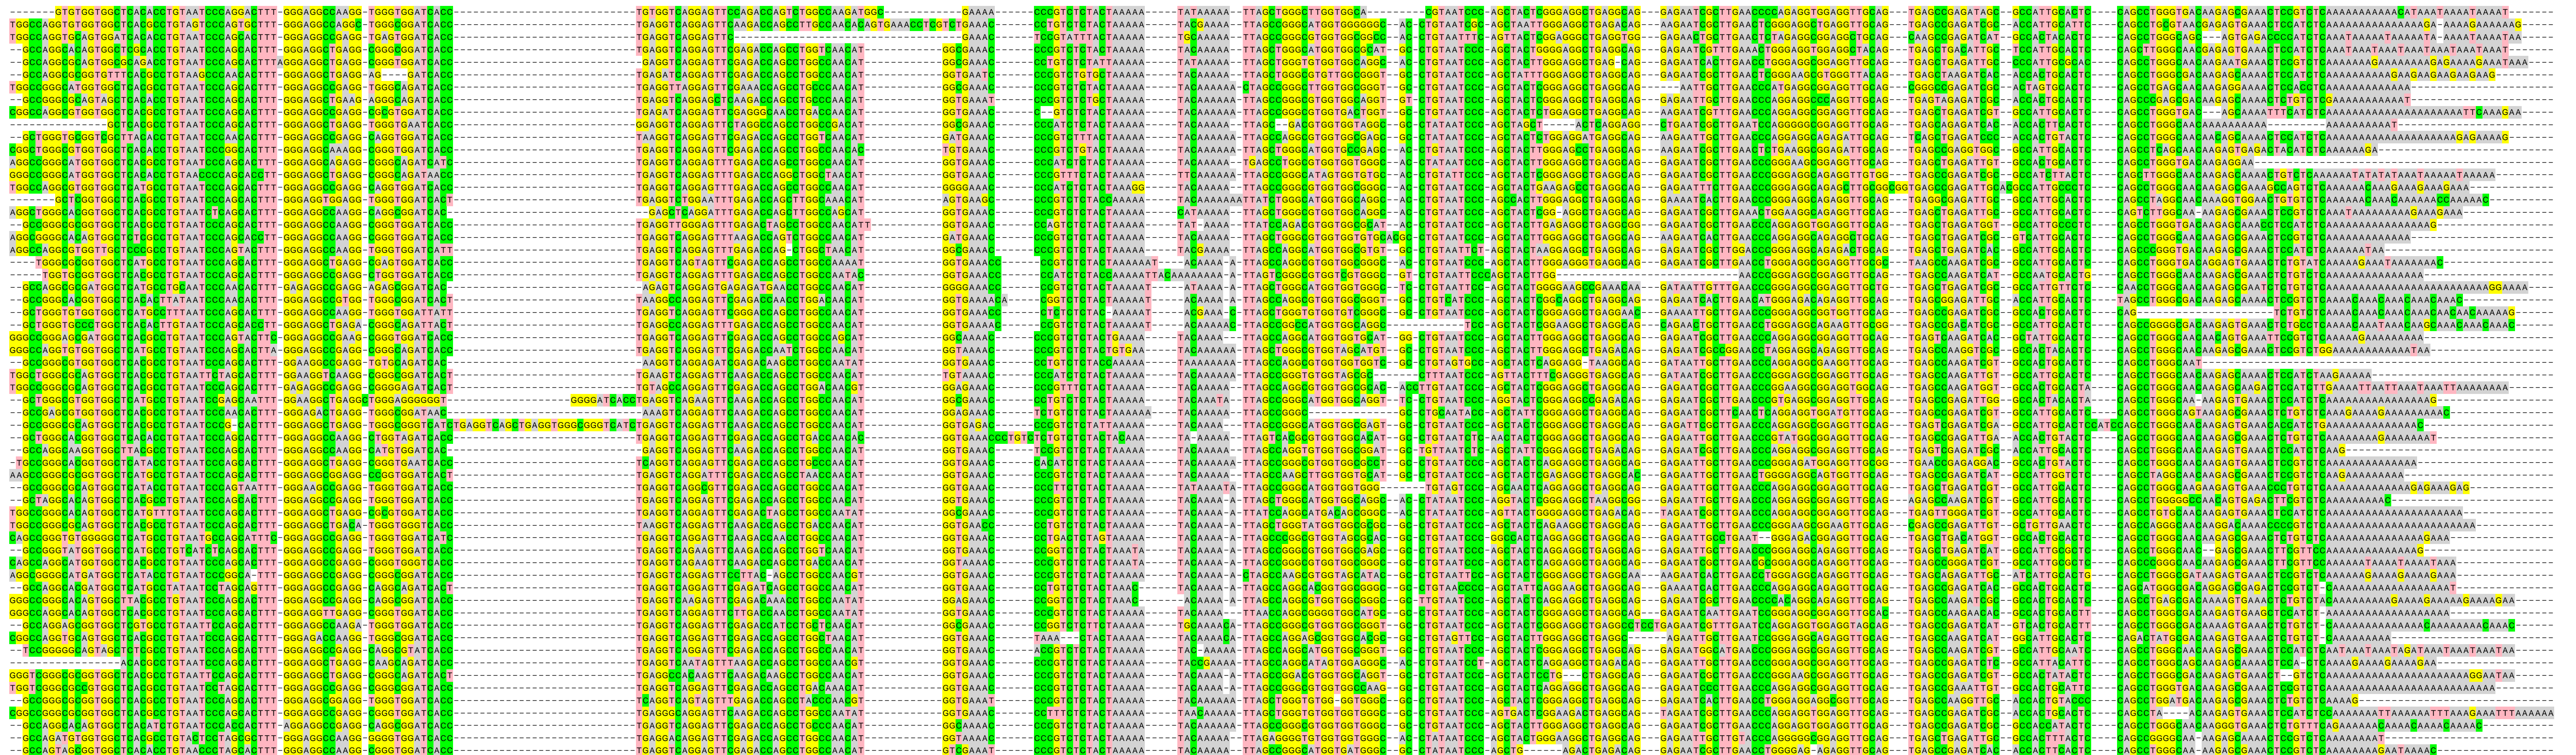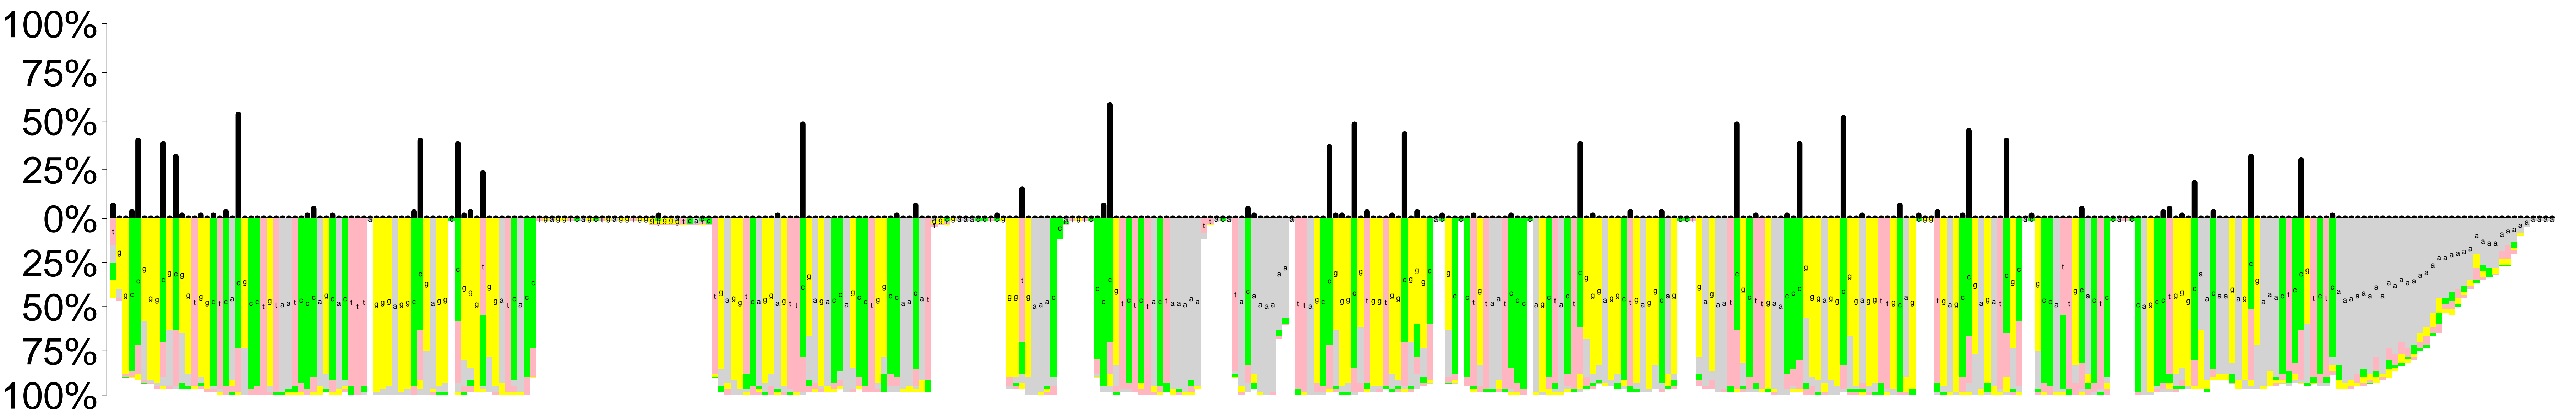

Supplement: NIHMS142127-supplement-11.pdf [file NIHMS142127-supplement-11.pdf]

# alignment, CG content and conservation of a random 60 AluYa(s)

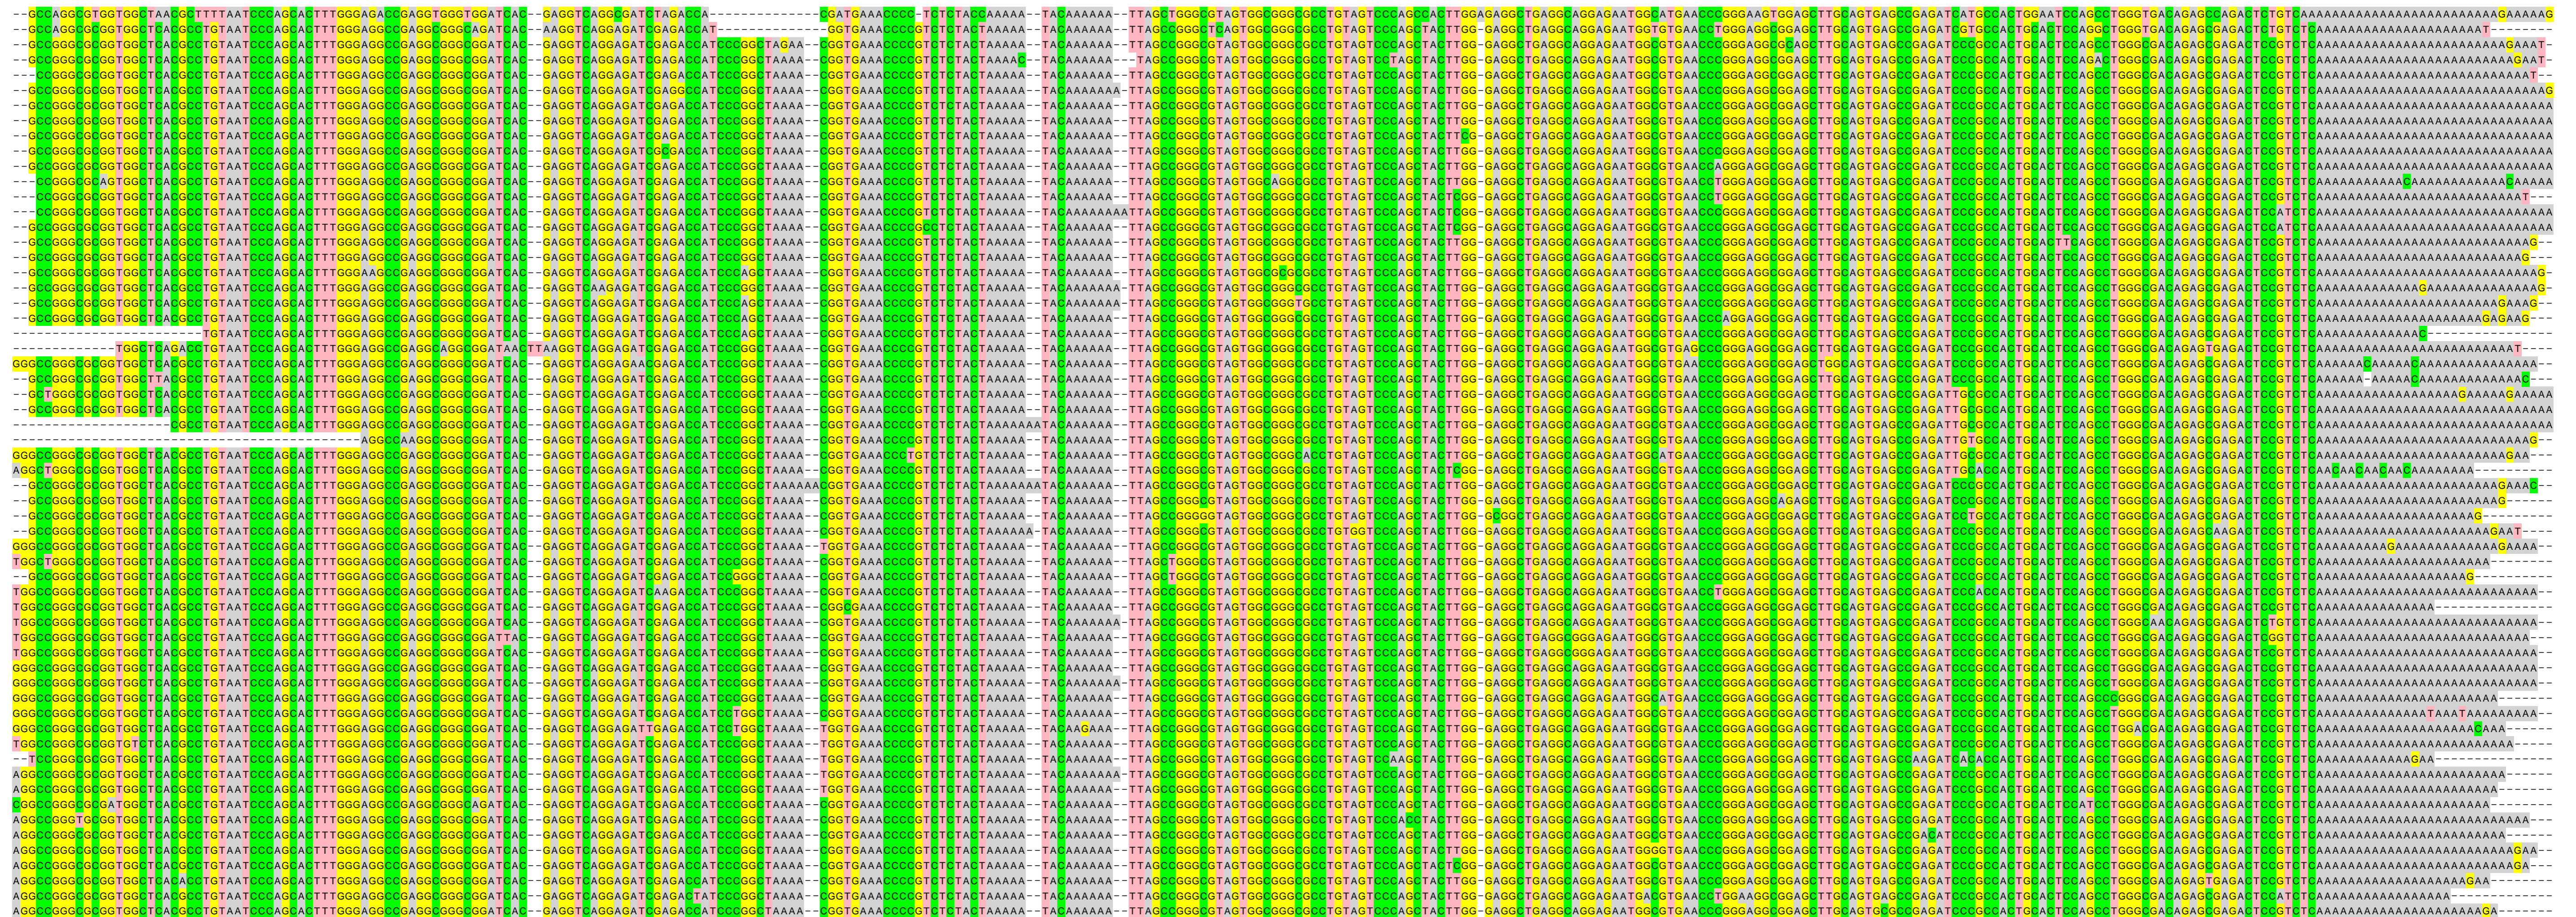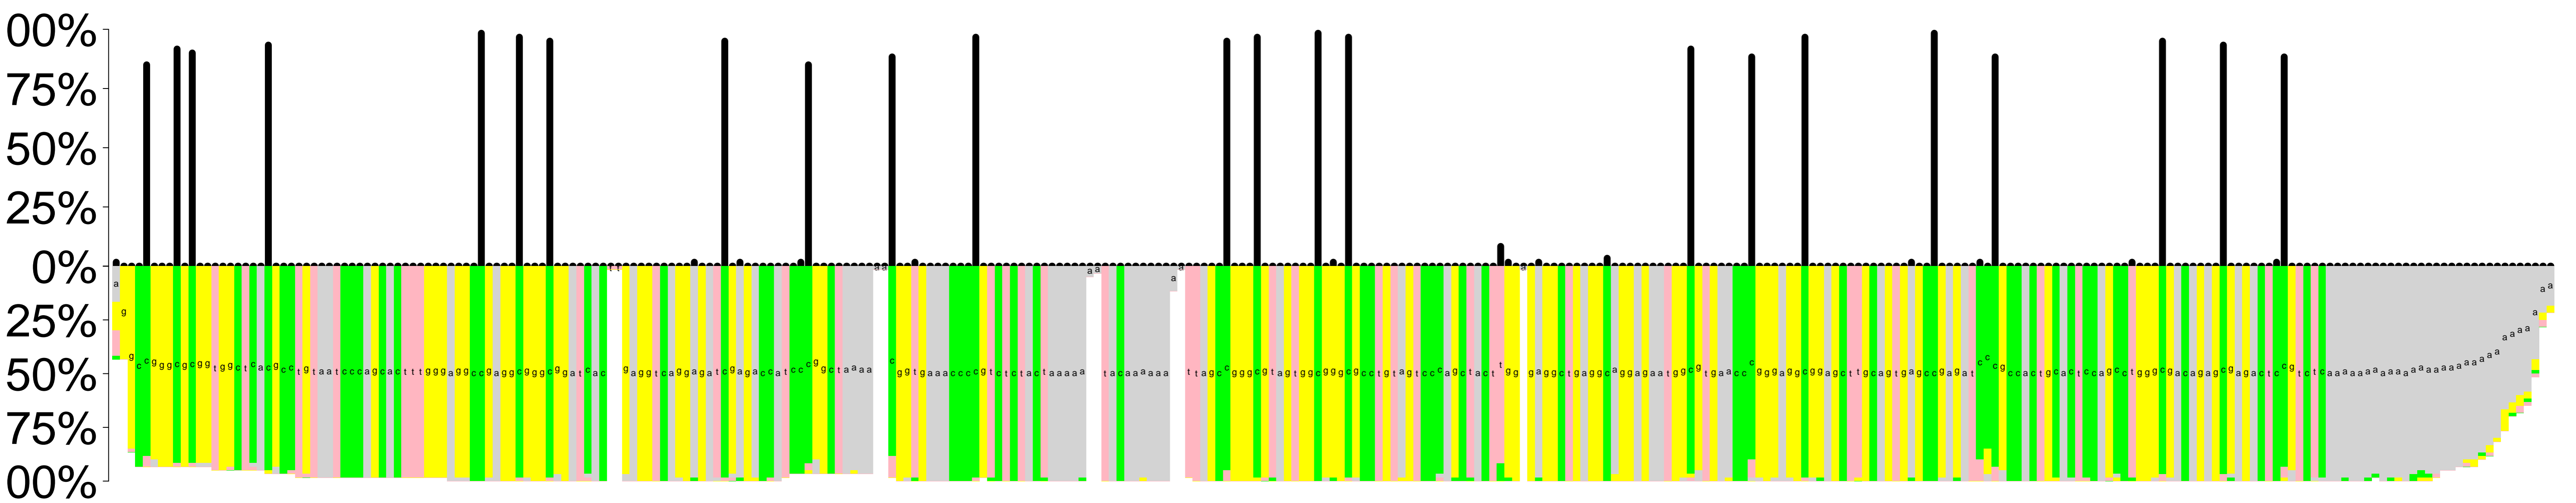

Supplement: NIHMS142127-supplement-12.pdf [file NIHMS142127-supplement-12.pdf]

# alignment, CG content and conservation of a random 60 AluYa5(s)

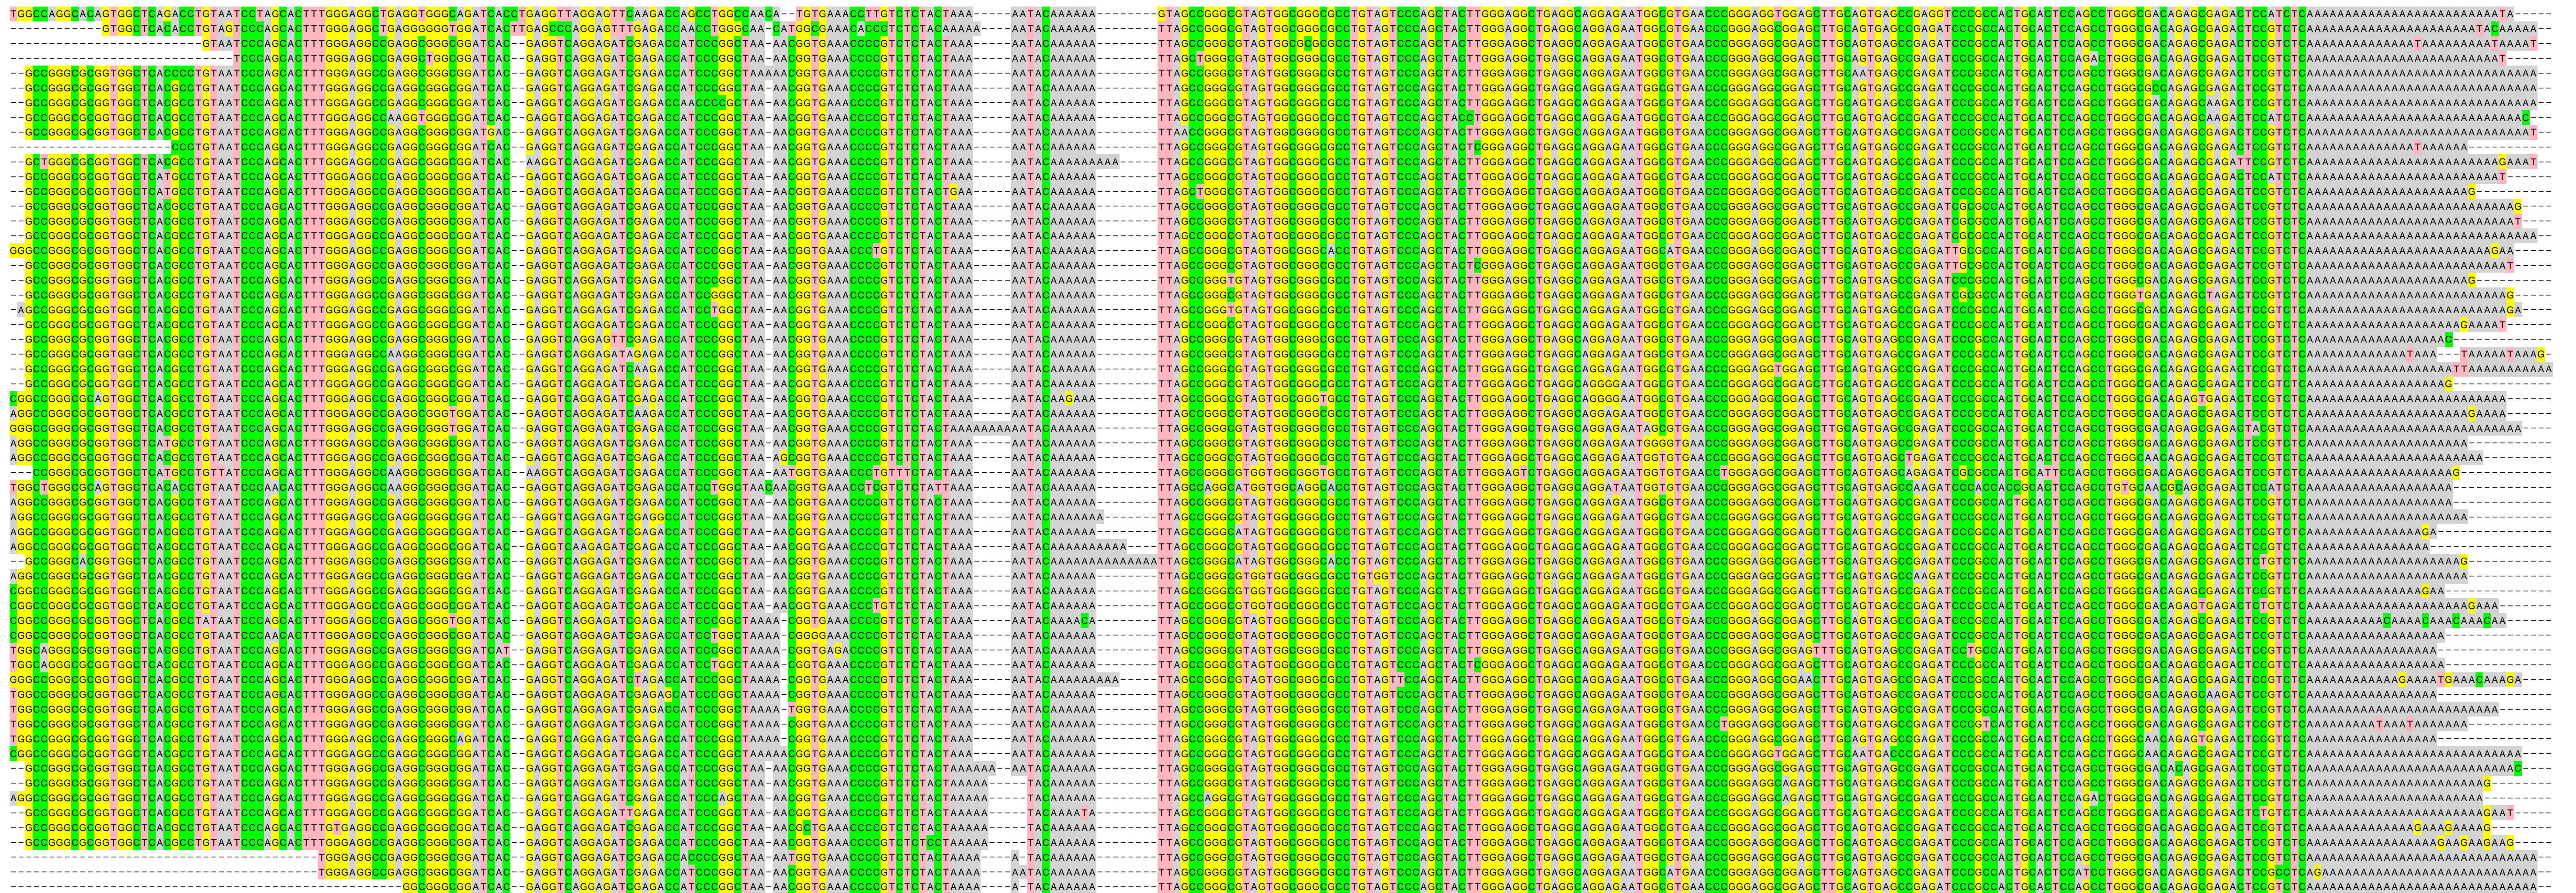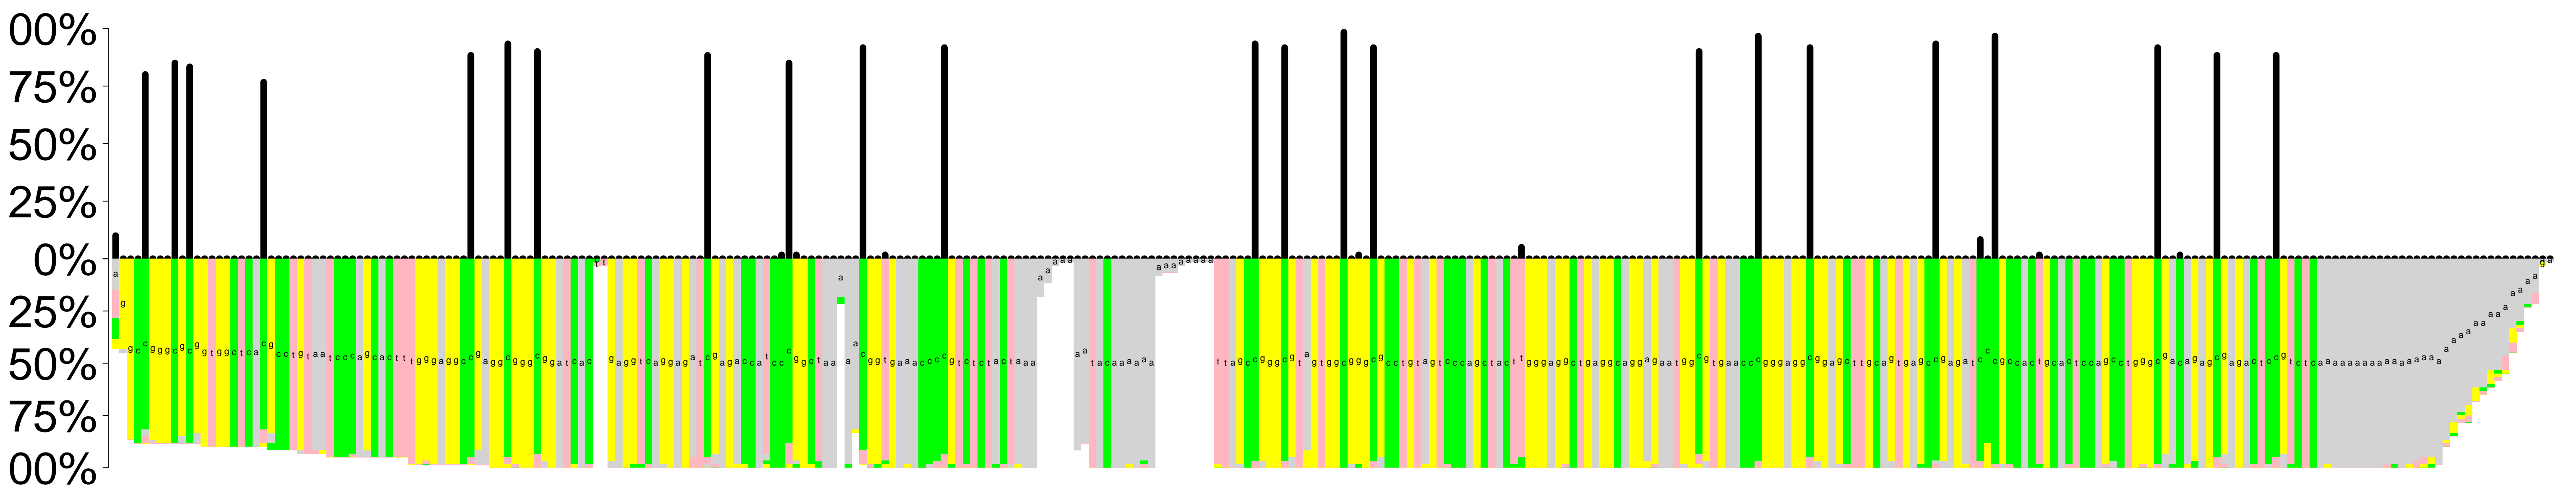

Supplement: NIHMS142127-supplement-13.pdf [file NIHMS142127-supplement-13.pdf]

# alignment, CG content and conservation of a random 60 AluYb(s)

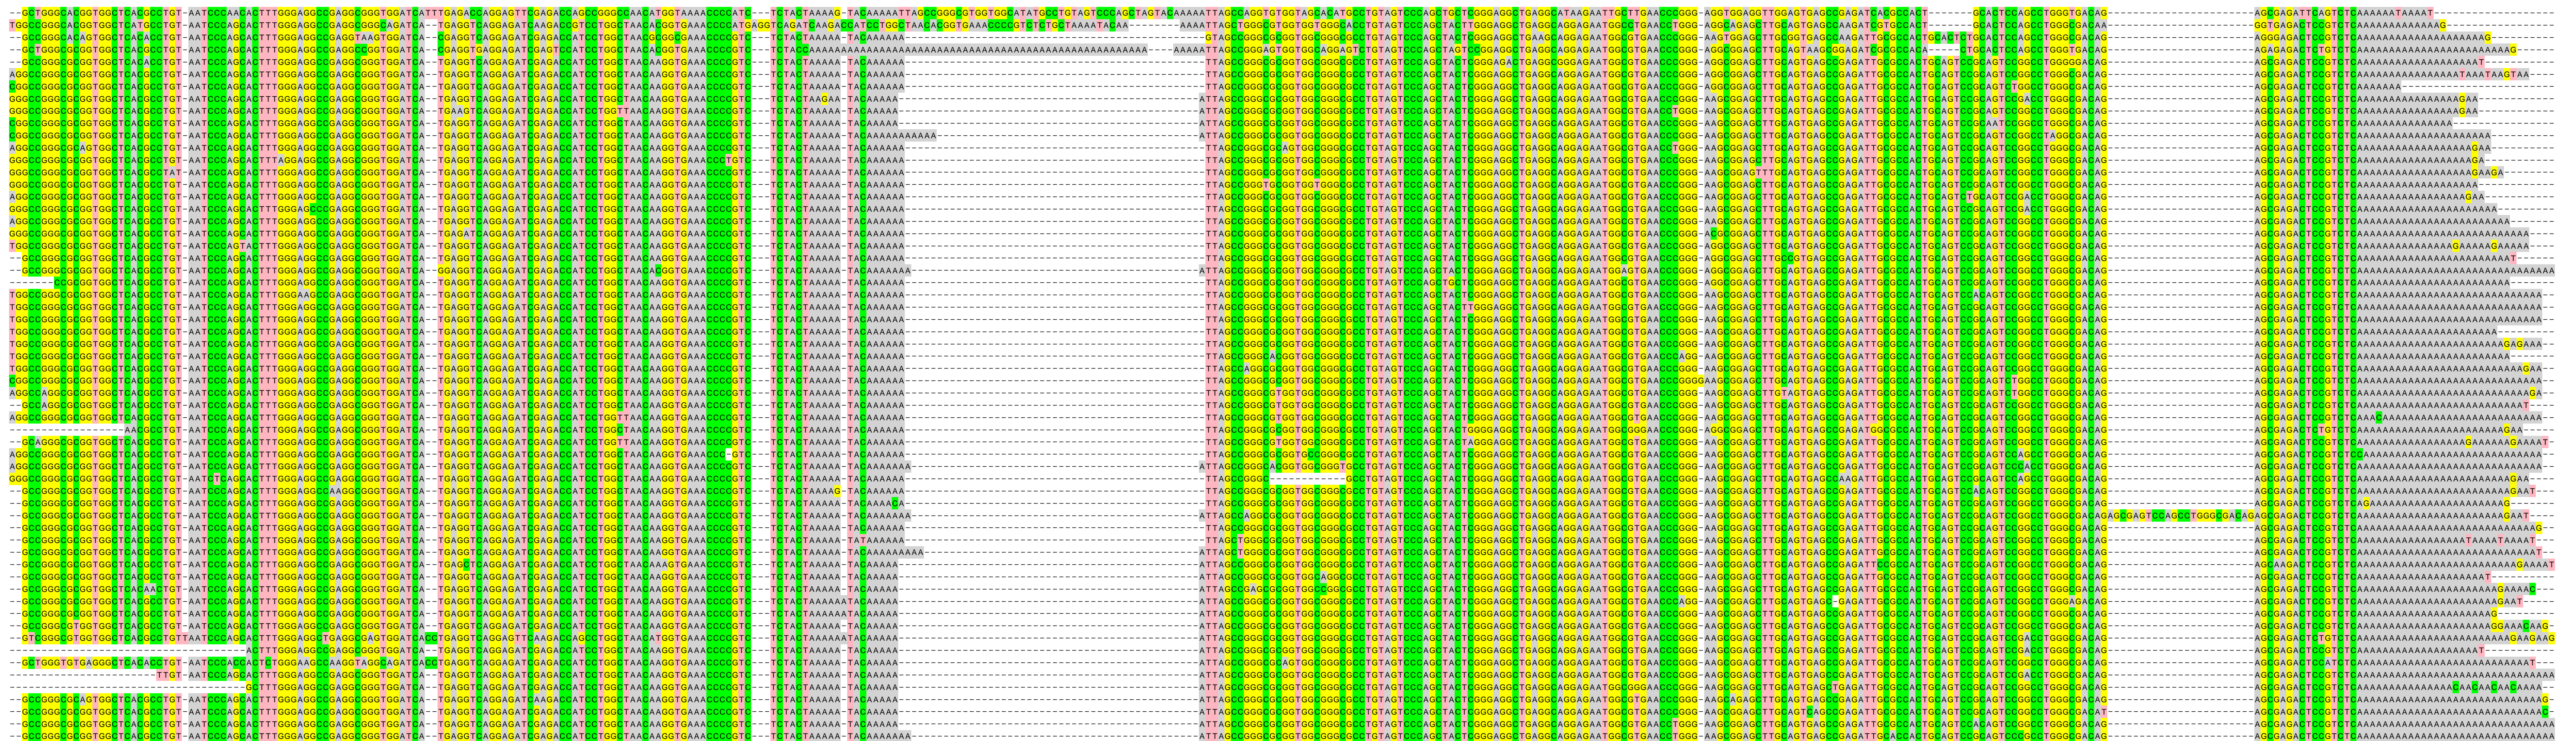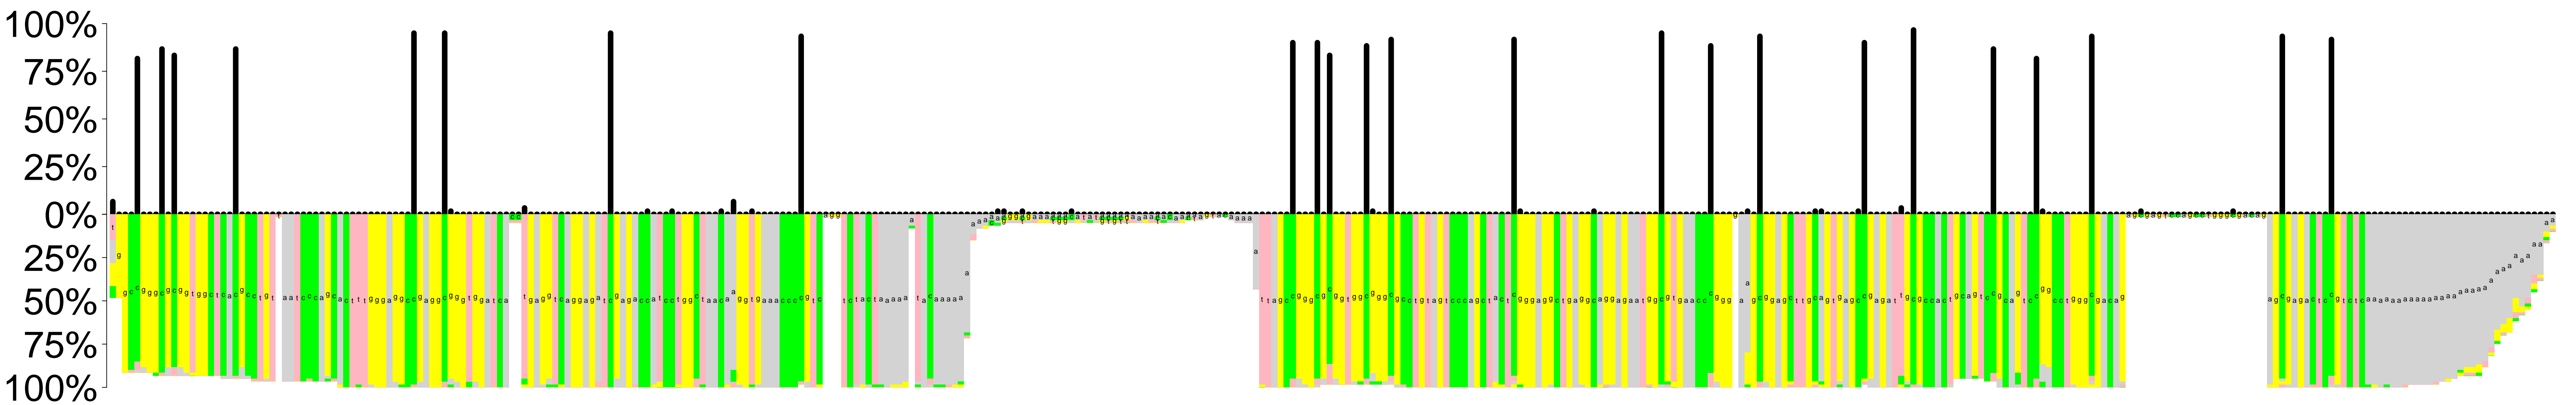

Supplement: NIHMS142127-supplement-14.pdf [file NIHMS142127-supplement-14.pdf]

# alignment, CG content and conservation of a random 60 AluYb9(s)

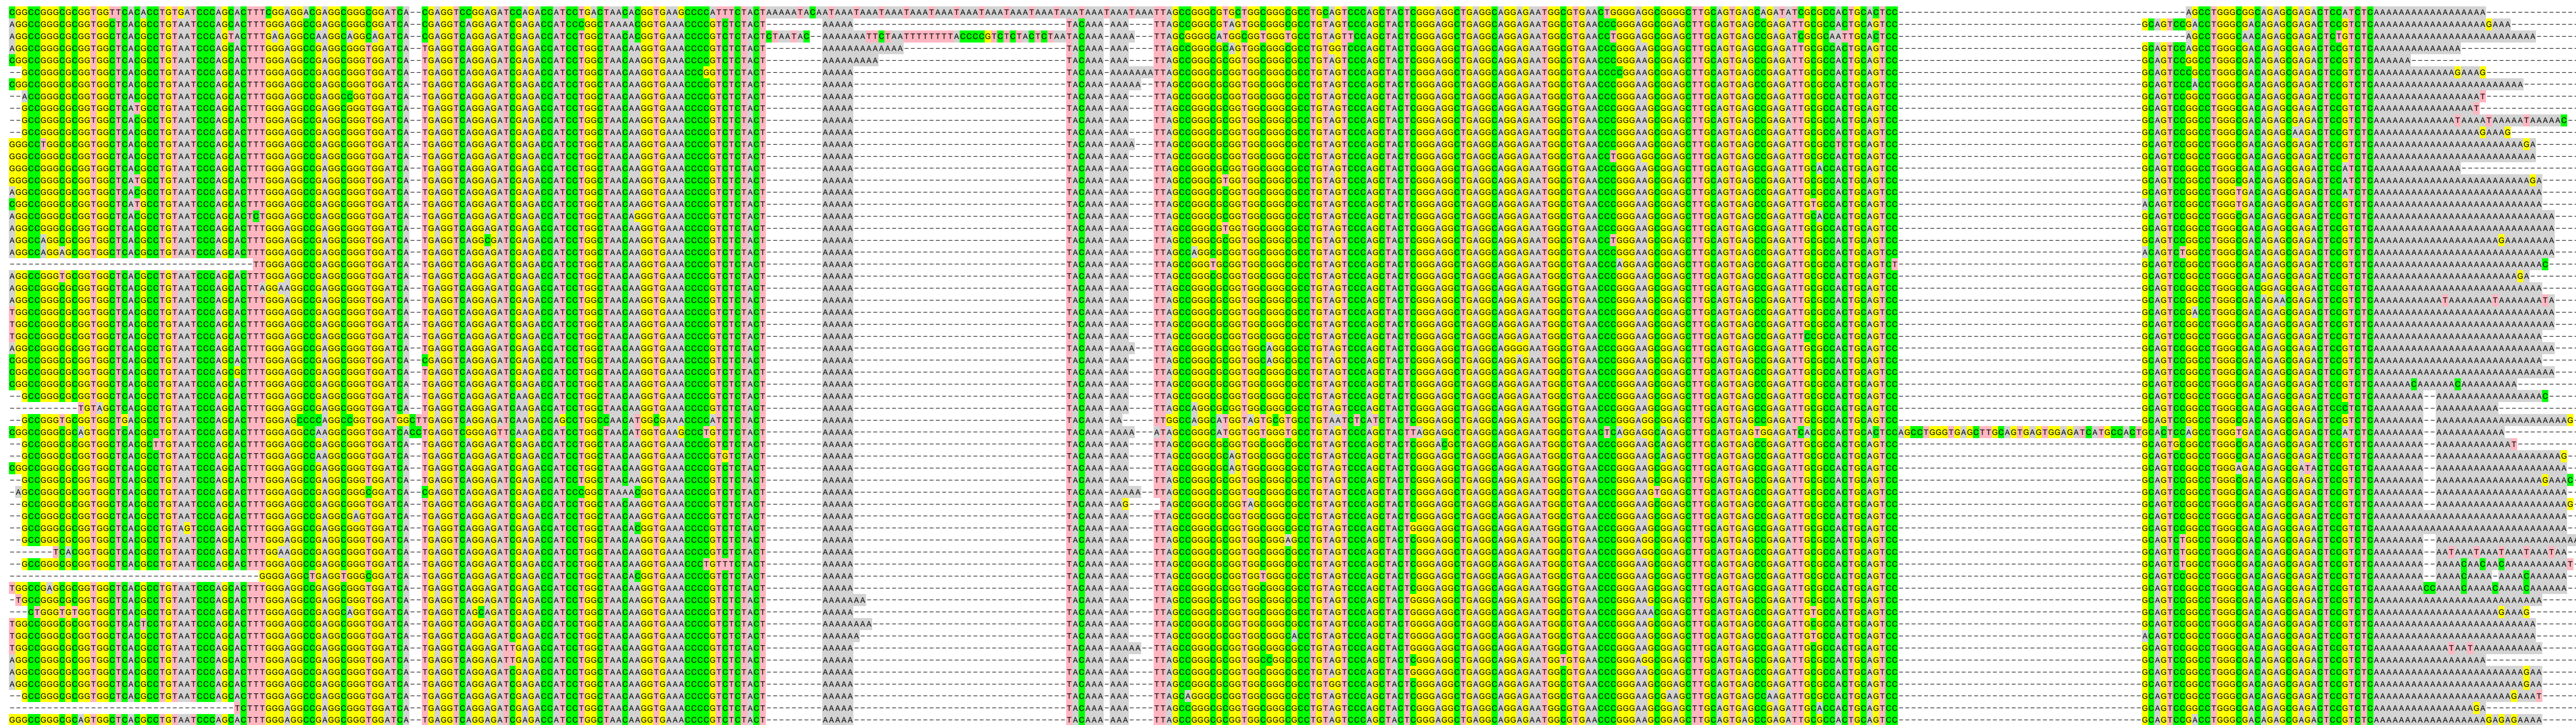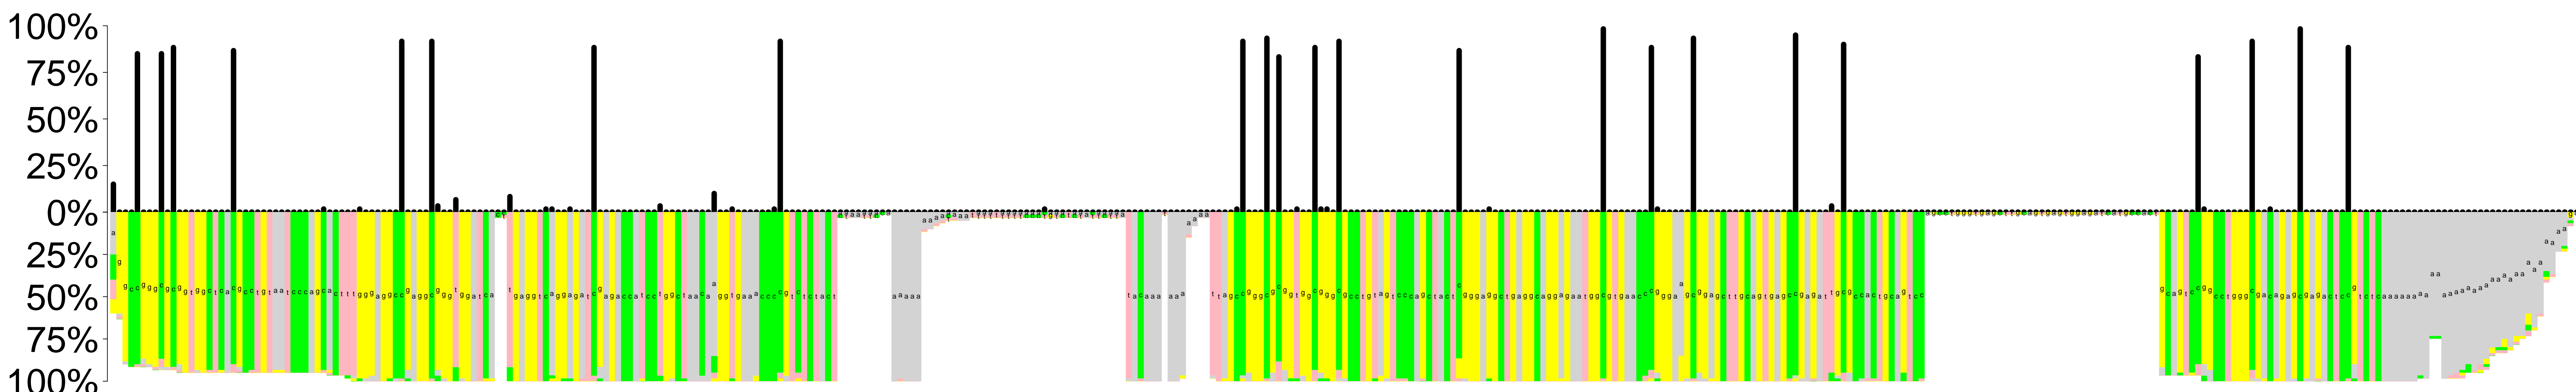

Supplement: NIHMS142127-supplement-15.pdf [file NIHMS142127-supplement-15.pdf]

# alignment, CG content and conservation of a random 60 AluYd(s)

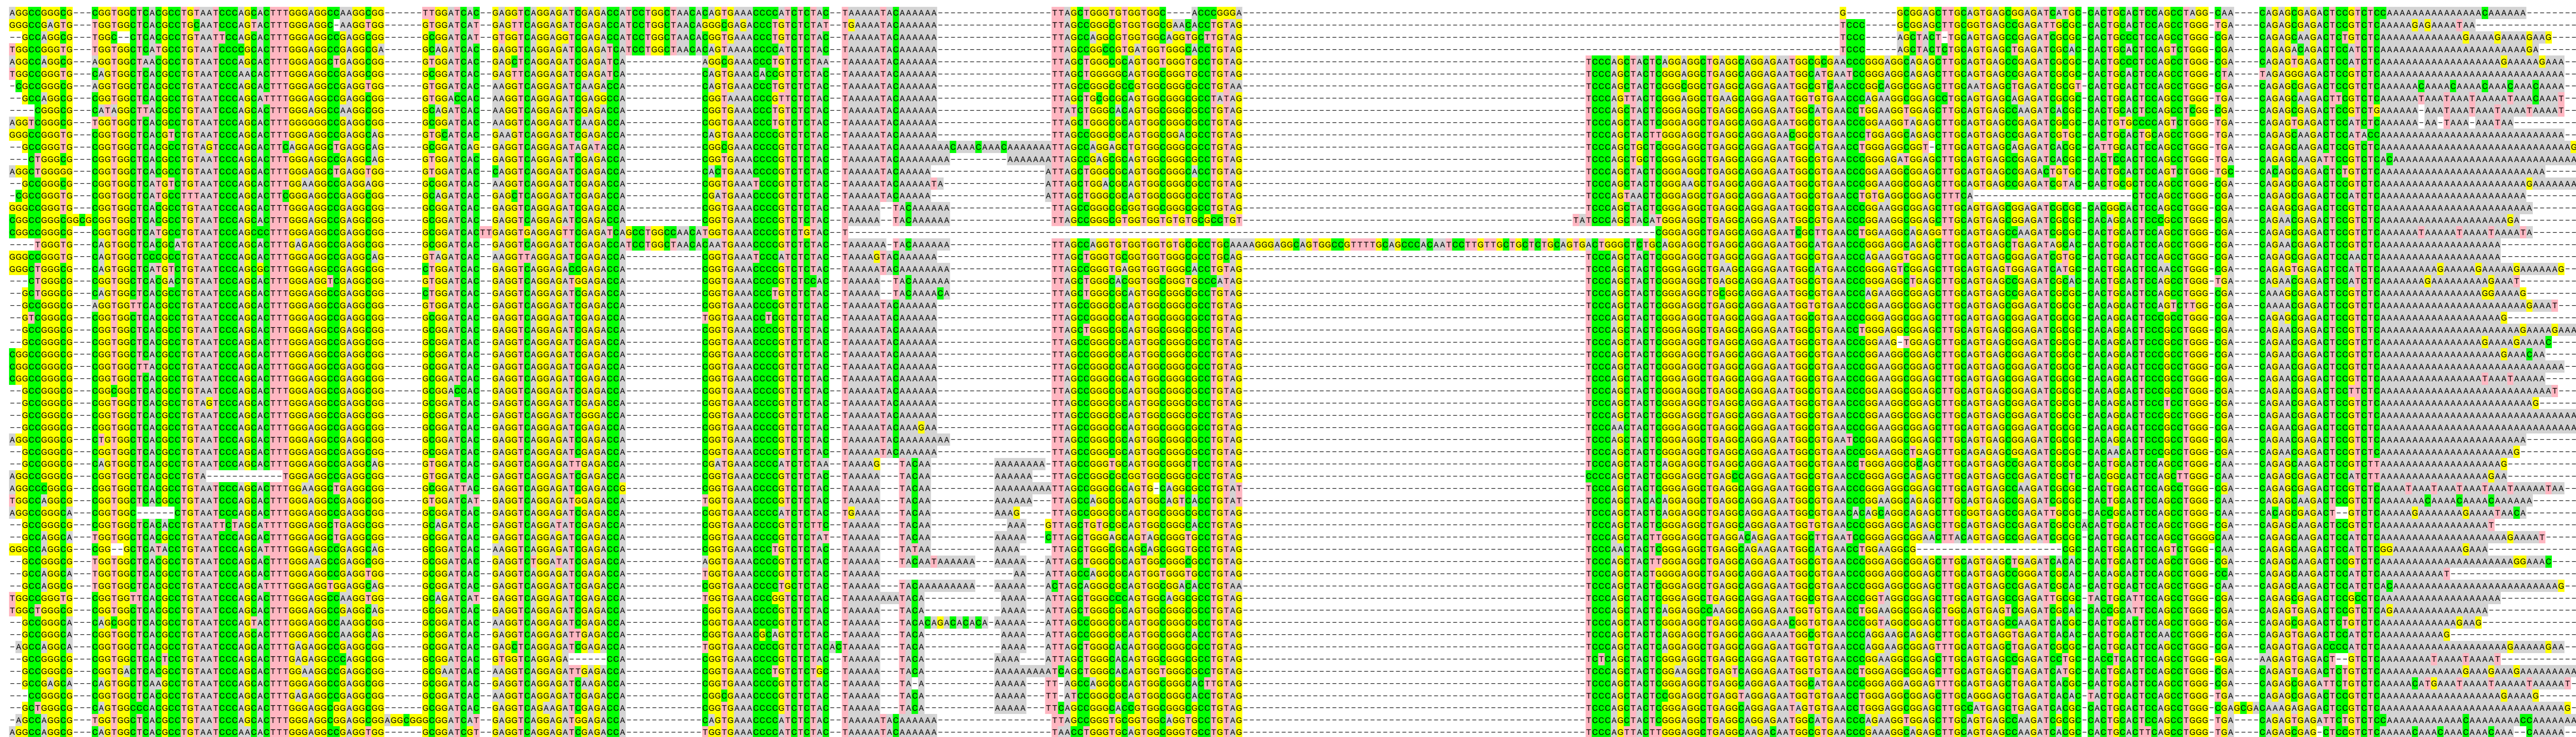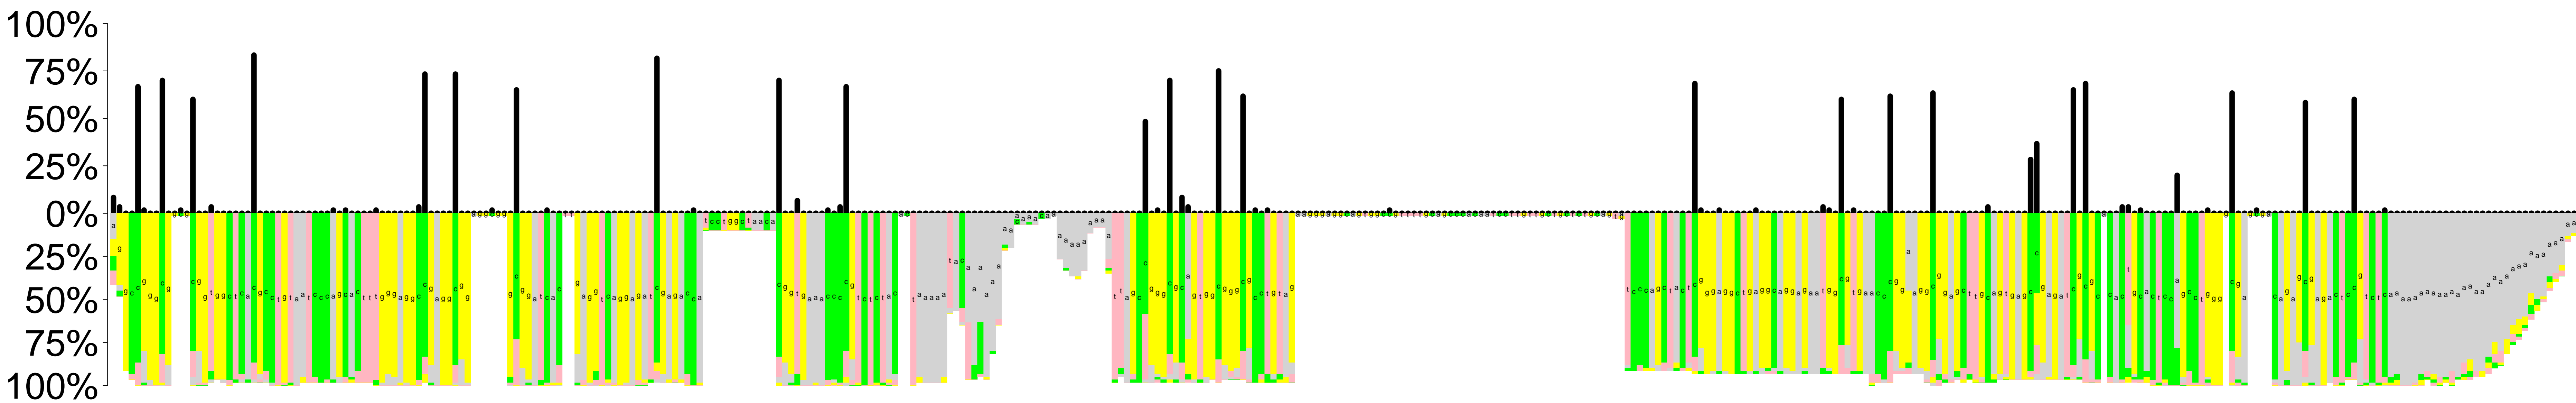

Supplement: NIHMS142127-supplement-16.pdf [file NIHMS142127-supplement-16.pdf]

# alignment, CG content and conservation of a random 60 AluYd8(s)

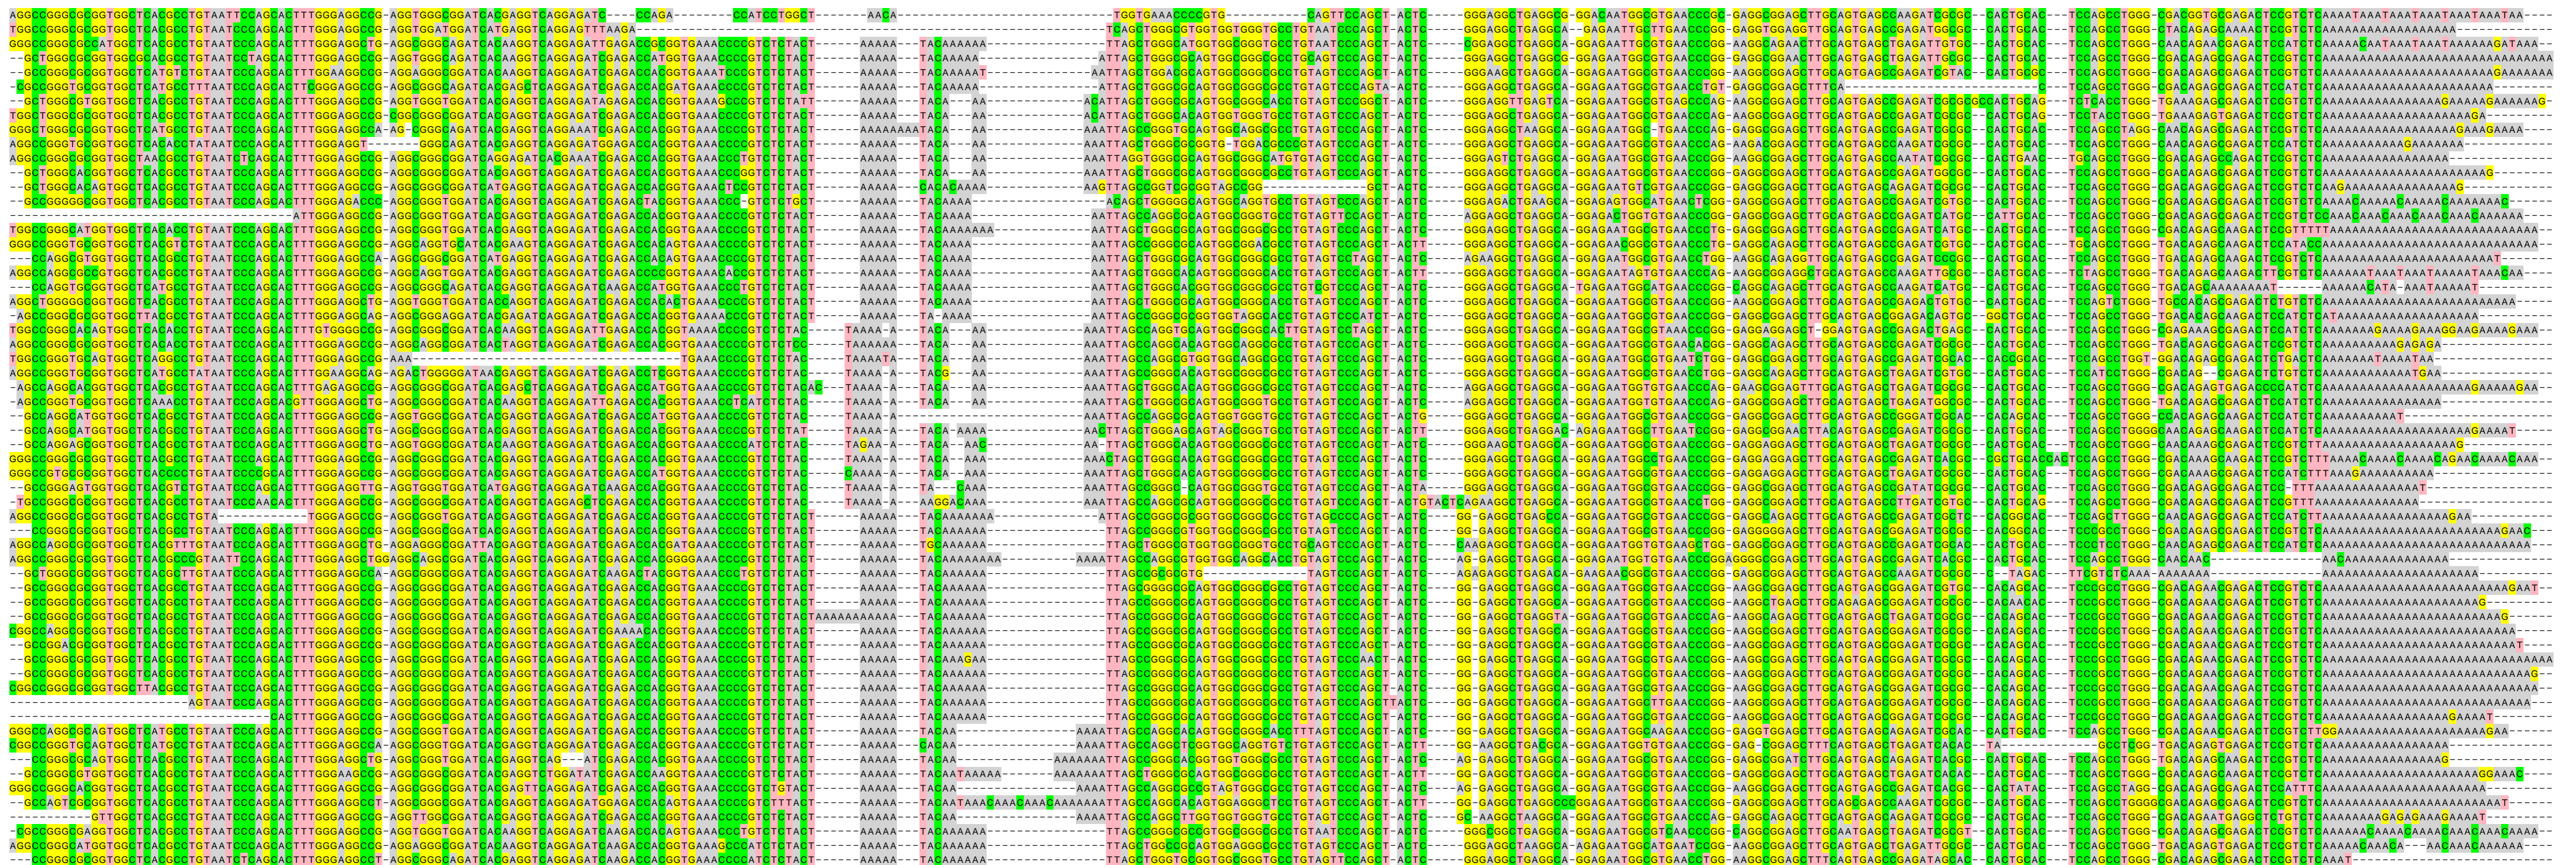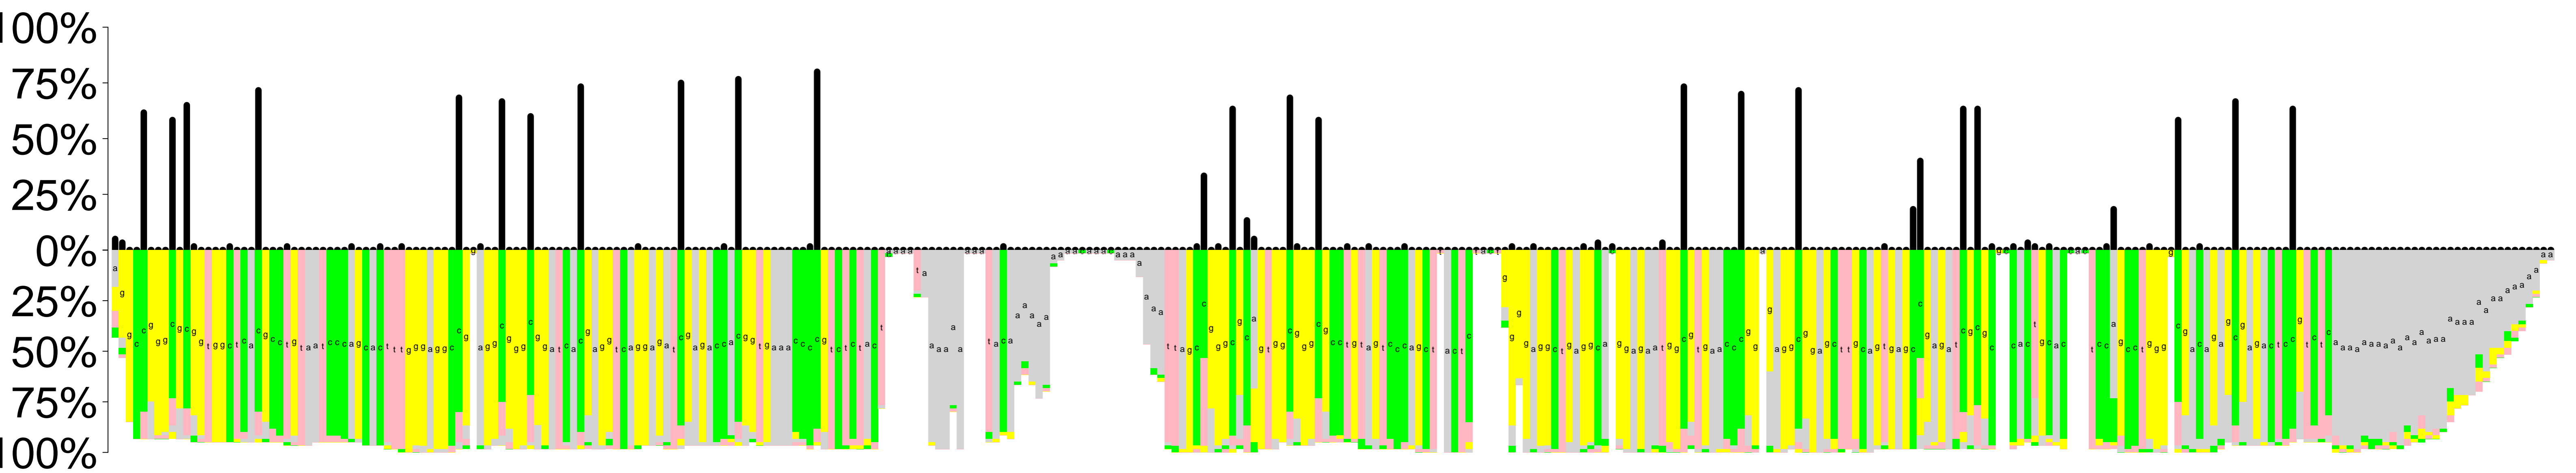

Supplement: NIHMS142127-supplement-17.pdf [file NIHMS142127-supplement-17.pdf]

# alignment, CG content and conservation of a random 60 AluYg(s)

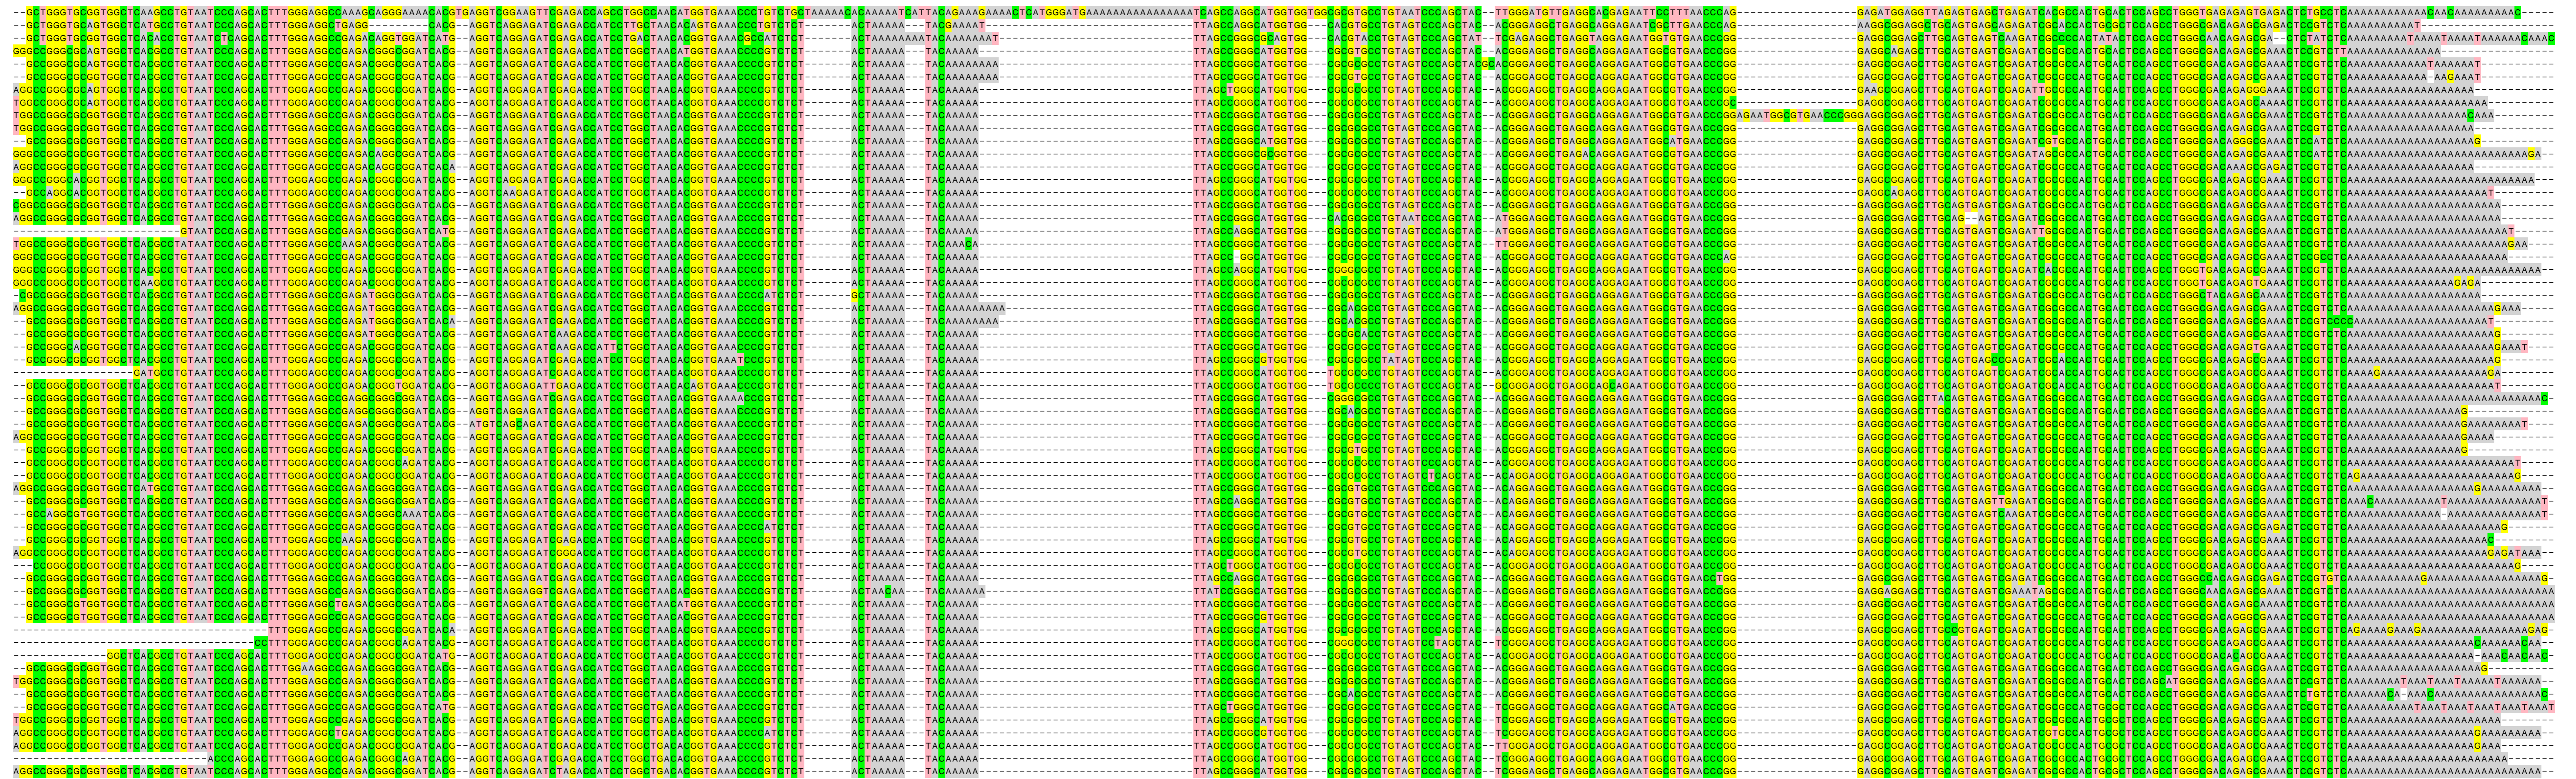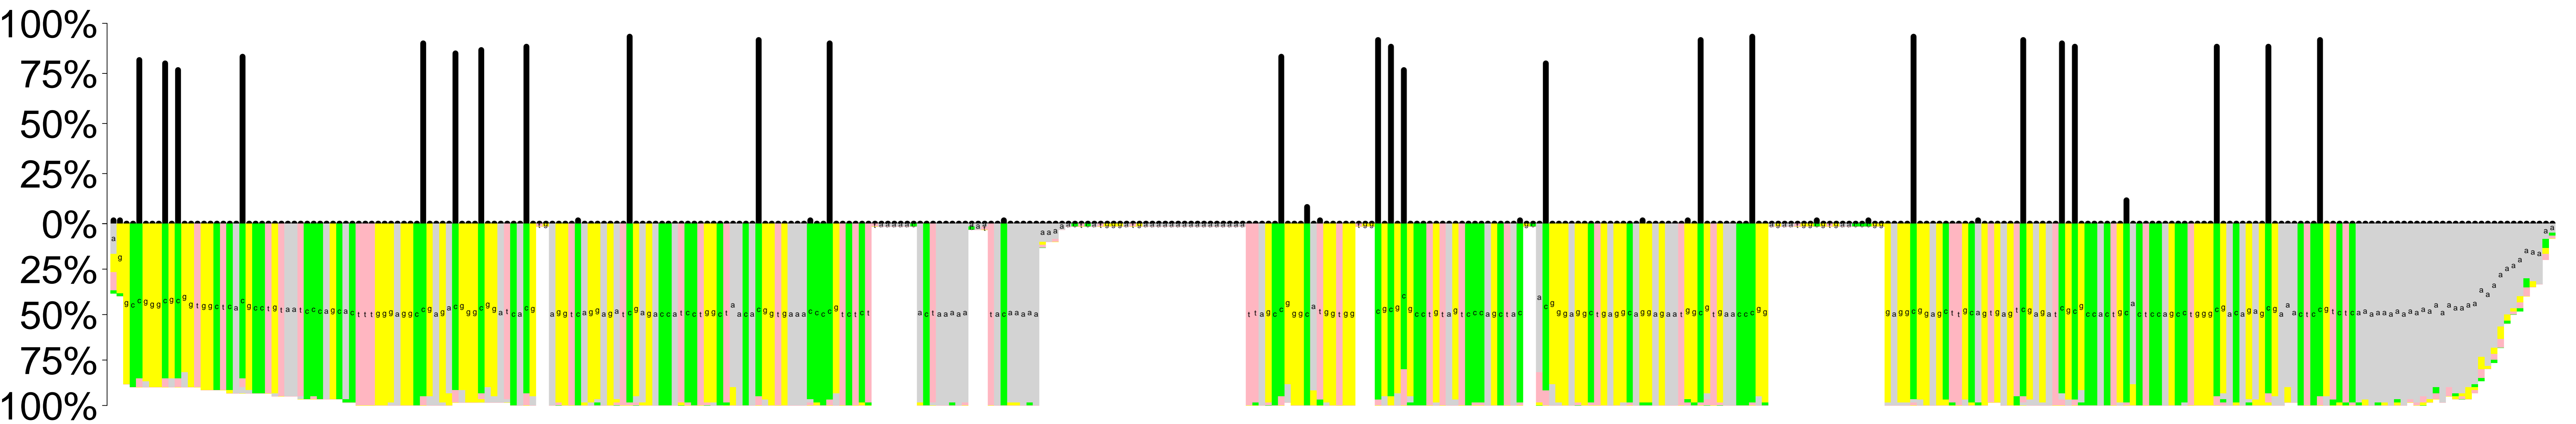

Supplement: NIHMS142127-supplement-18.pdf [file NIHMS142127-supplement-18.pdf]

# alignment, CG content and conservation of a random 60 AluYg6(s)

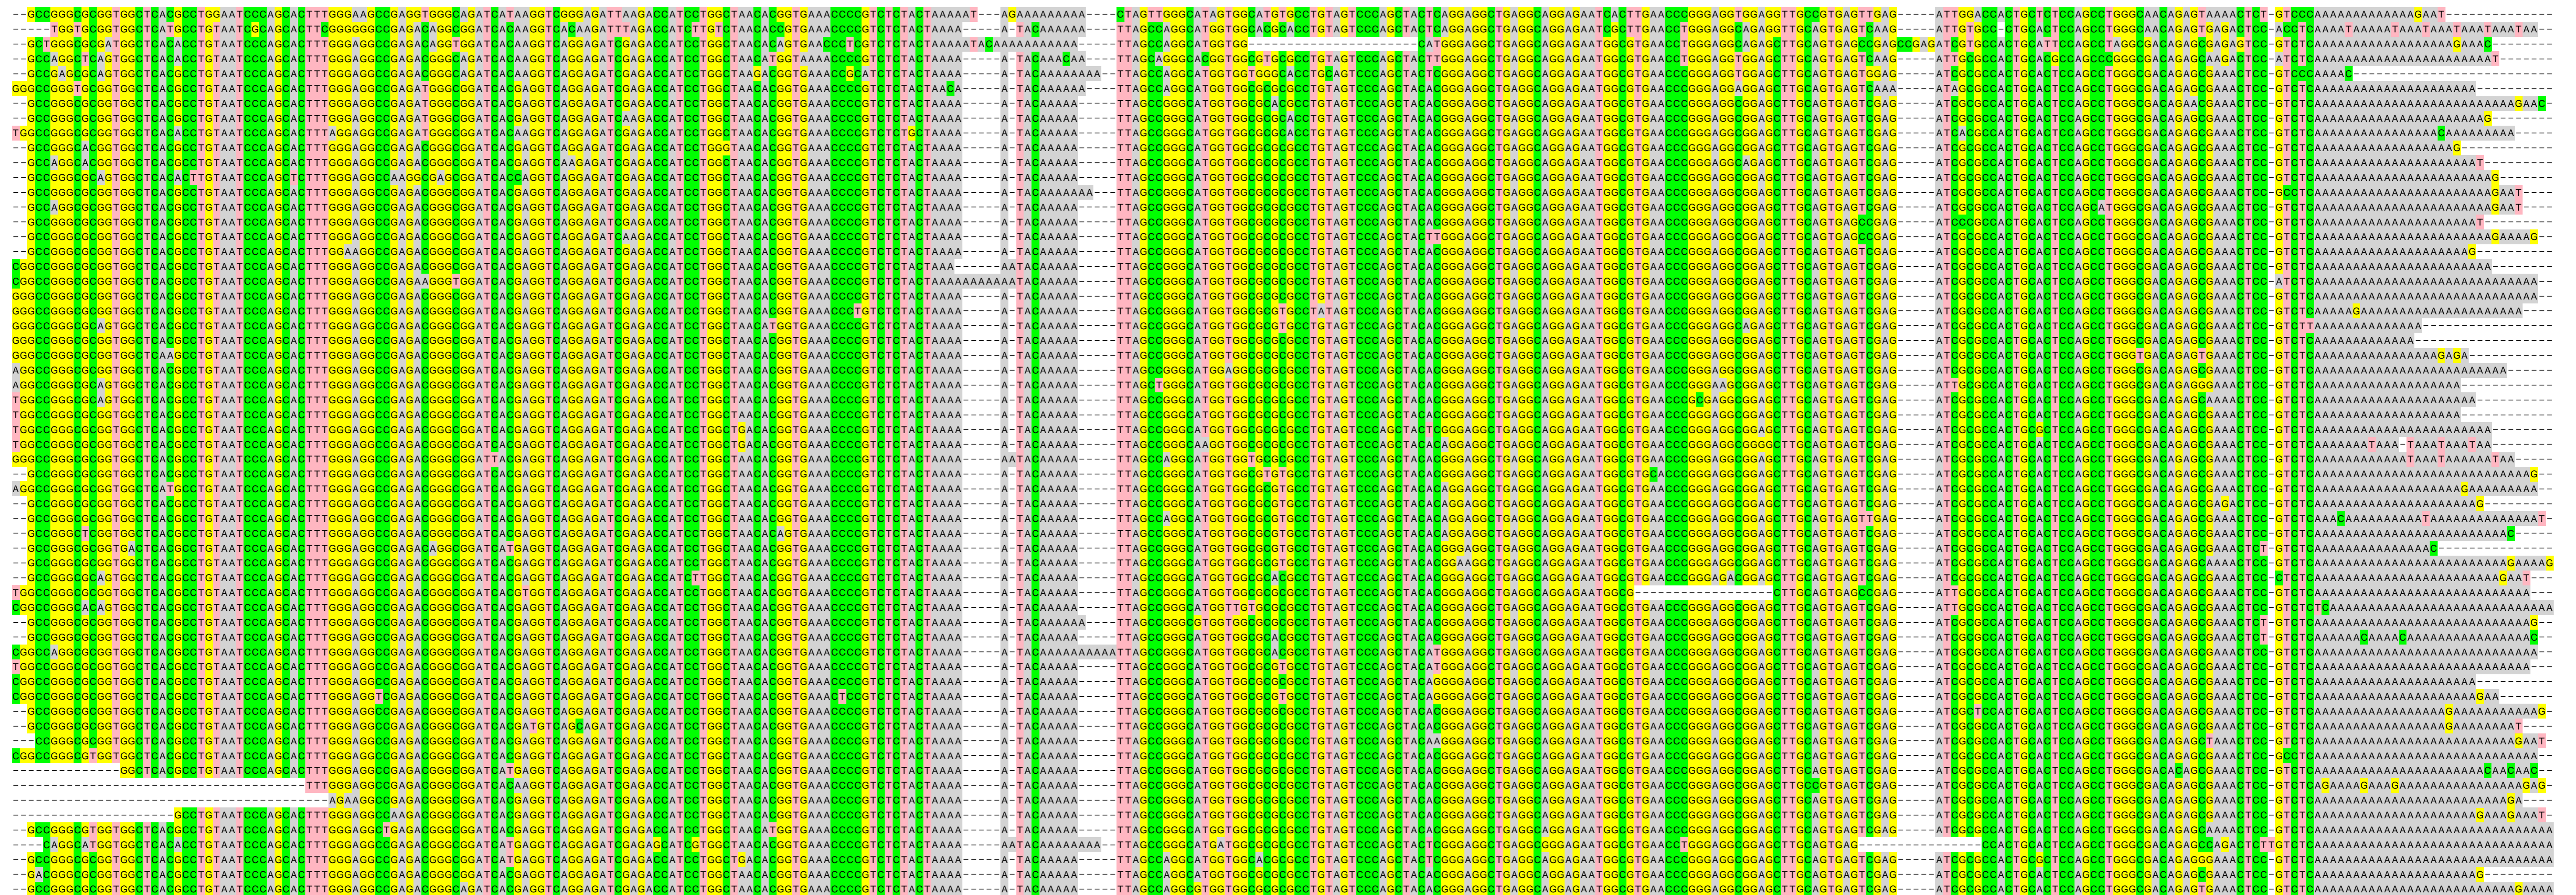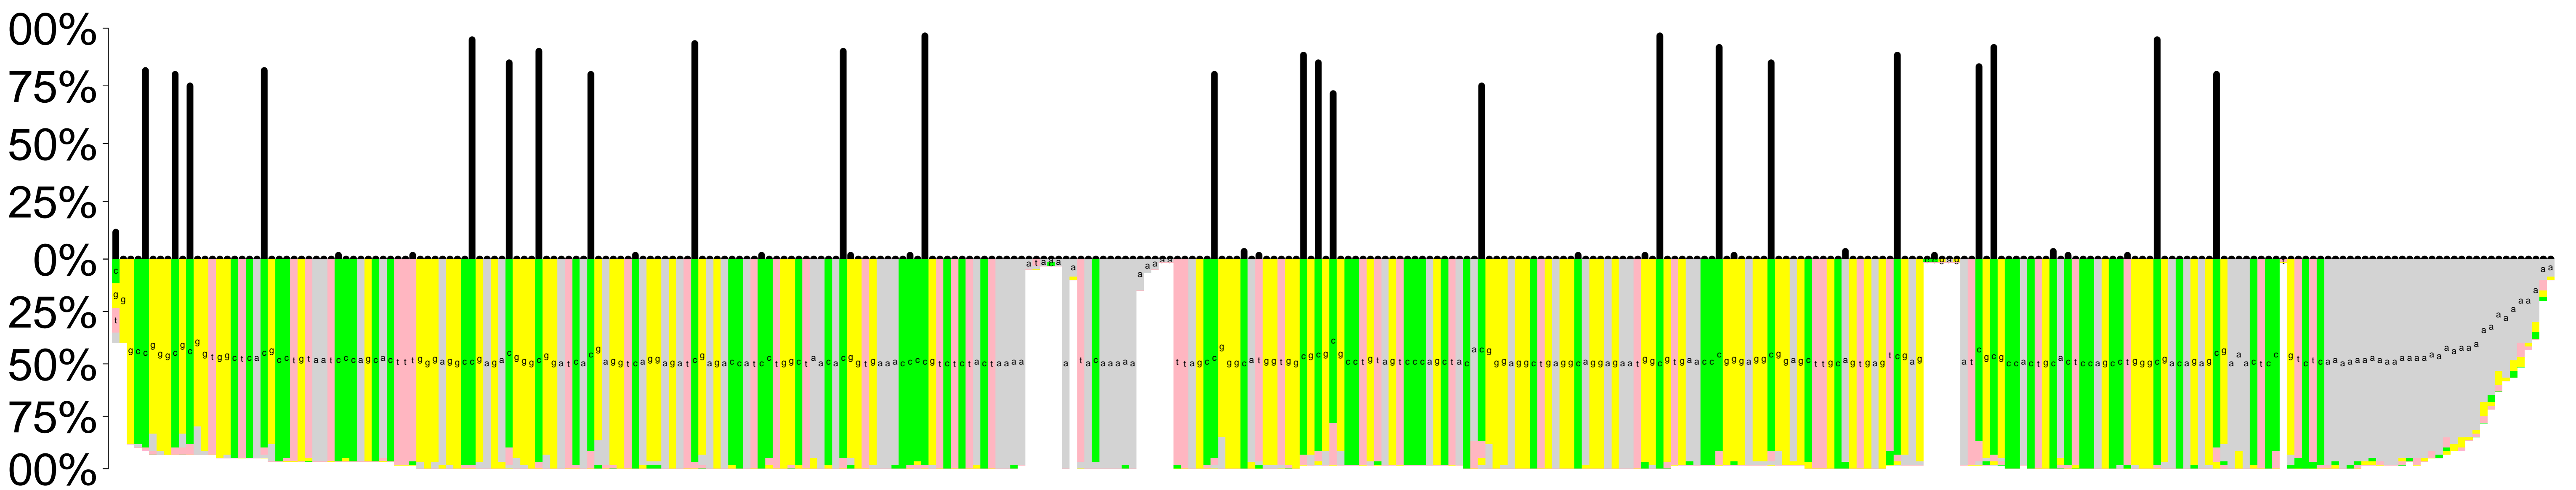

Supplement: NIHMS142127-supplement-19.pdf [file NIHMS142127-supplement-19.pdf]

# alignment, CG content and conservation of a random 60 MLT1B(s)

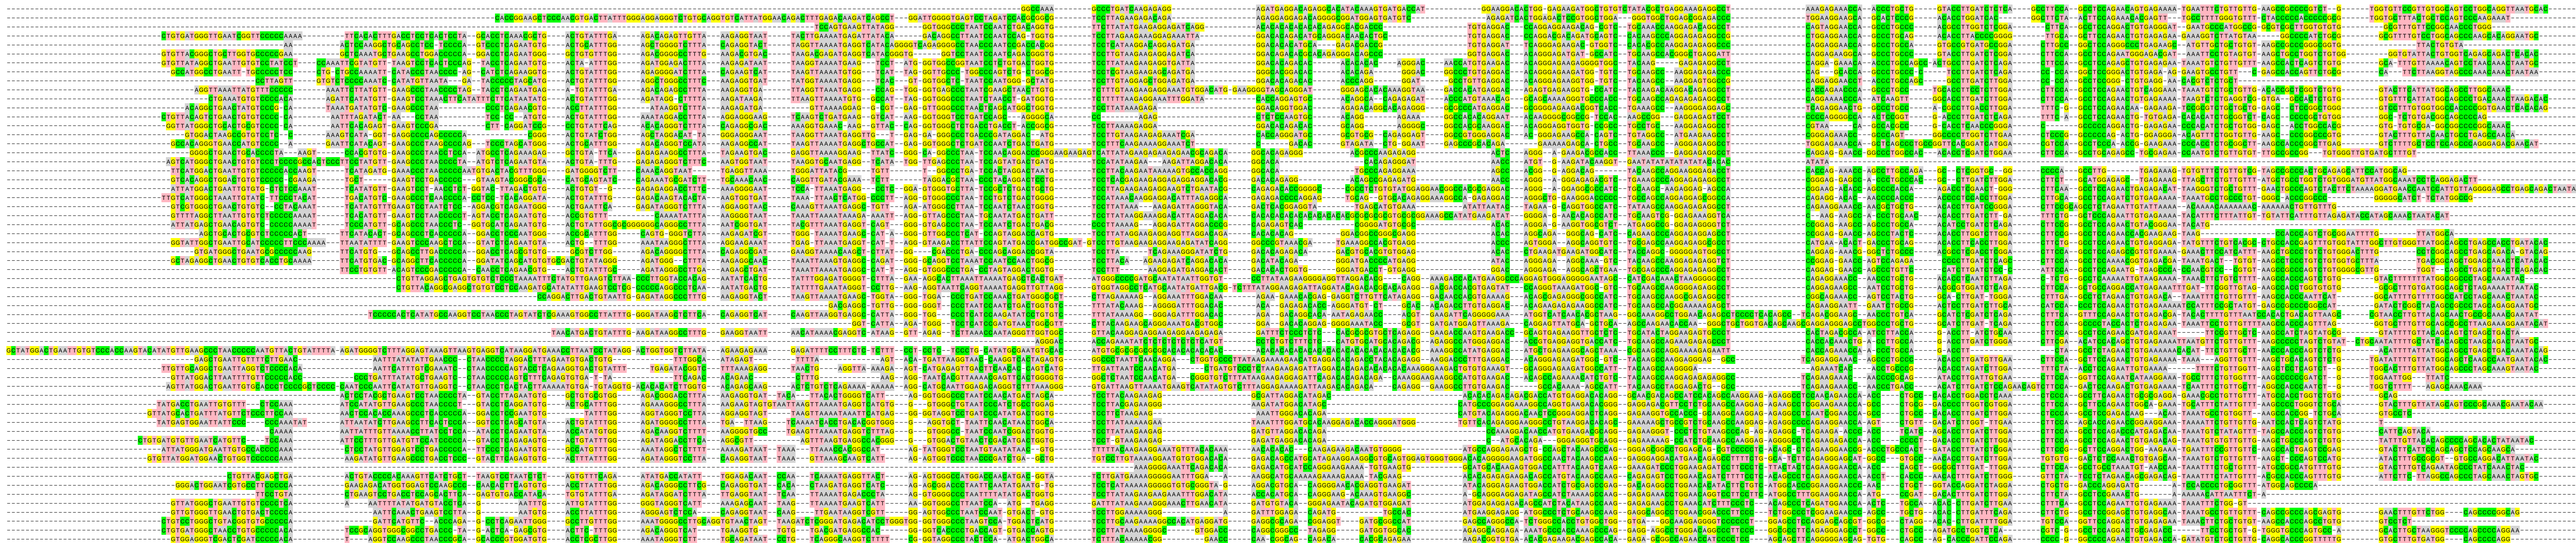

100%  
75%  
50%  
25%  
0%  
25%  
50%  
75%  
100%

Supplement: NIHMS142127-supplement-44.pdf [file NIHMS142127-supplement-44.pdf]

# alignment, CG content and conservation of a random 60 MLT1C(s)

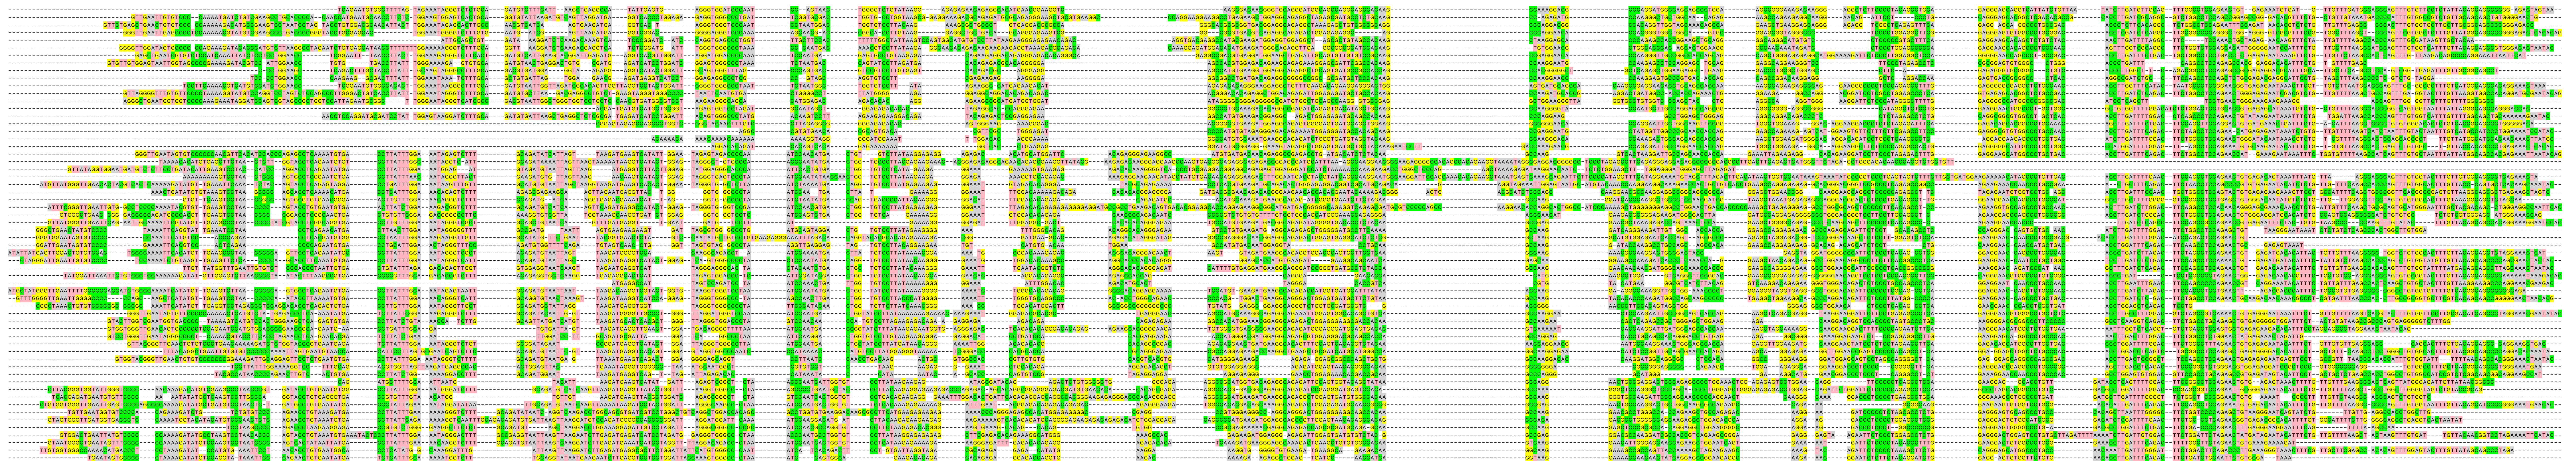

100%  
75%  
50%  
25%  
0%  
25%  
50%  
75%  
100%

Supplement: NIHMS142127-supplement-45.pdf [file NIHMS142127-supplement-45.pdf]

# alignment, CG content and conservation of a random 60 MLT1D(s)

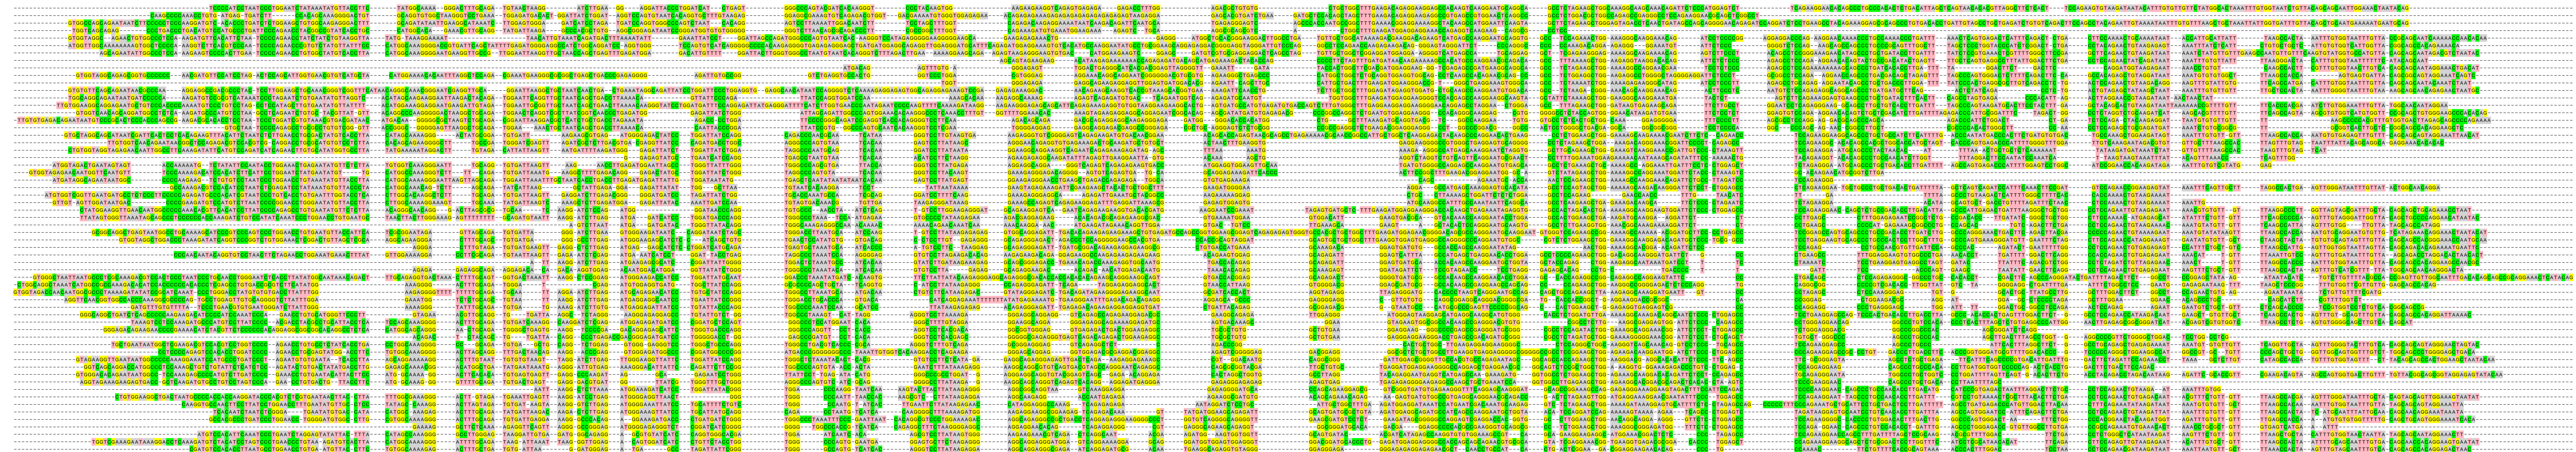

100%  
75%  
50%  
25%  
0%  
25%  
50%  
75%  
100%

Supplement: NIHMS142127-supplement-46.pdf [file NIHMS142127-supplement-46.pdf]

# alignment, CG content and conservation of a random 60 MSTA(s)

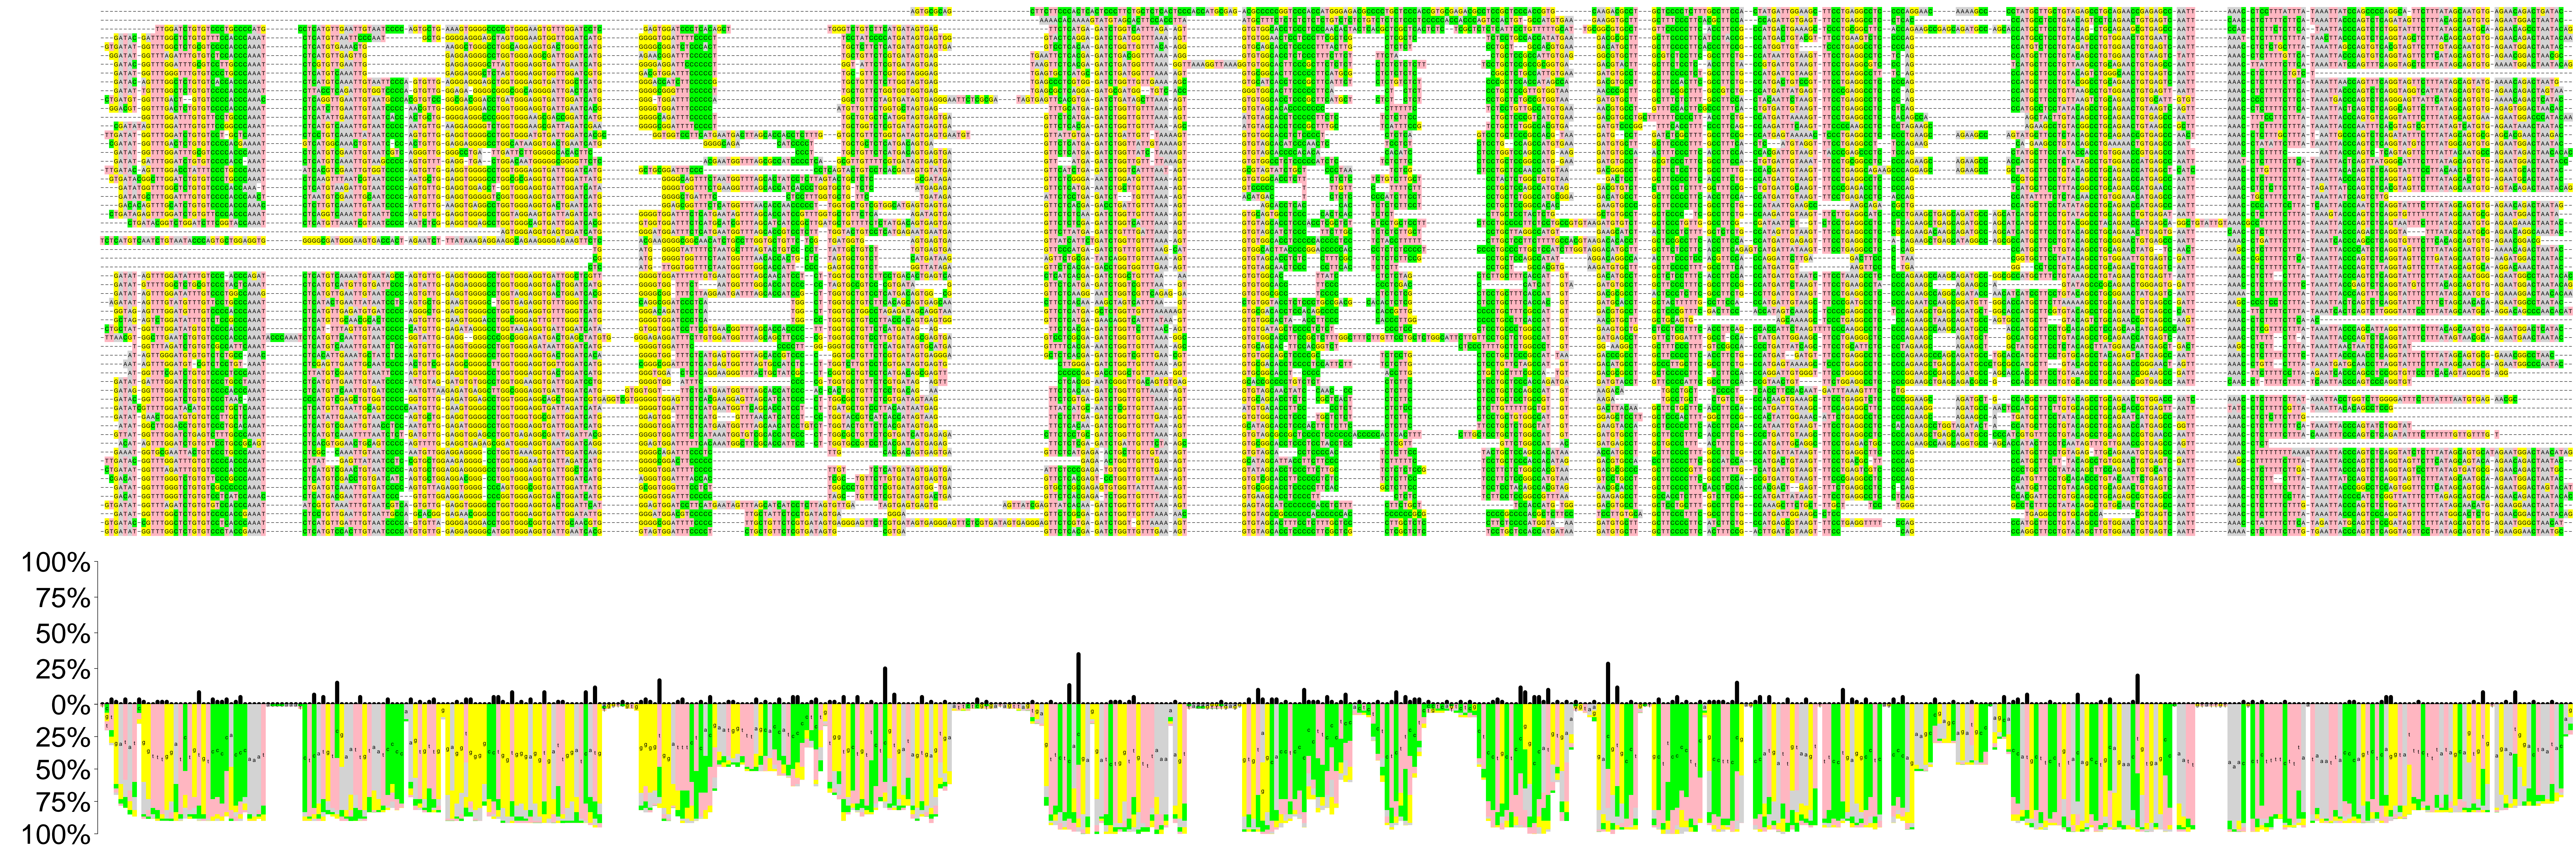

Supplement: NIHMS142127-supplement-47.pdf [file NIHMS142127-supplement-47.pdf]
